# Supplementary material for: Cytokines and Chemokines in Breastmilk of SARS-CoV-2 Infected or COVID-19 Vaccinated Mothers
Source: MDPI journal article supplement (doi:10.3390/vaccines10122001), 2022-11-24
Supplement: s1 [file s1]

## Supplementary Materials

*Table S1. Characteristics of anti-SARS – CoV – 2 vaccinated mothers group*

| <b>ID No</b> | <b>Anti-RBD IgG</b> | <b>Child`s age (months)</b> | <b>Mother`s age (years)</b> | <b>Mother`s parity</b> | <b>Birth type</b> | <b>Vaccine type</b> | <b>Side effects after vaccination</b>    |
|--------------|---------------------|-----------------------------|-----------------------------|------------------------|-------------------|---------------------|------------------------------------------|
| 1            | +                   | 9                           | 30                          | 1                      | Cesarean section  | Pfizer              | Local pain                               |
| 2            | +                   | 23                          | 31                          | 1                      | Cesarean section  | Pfizer              | Local pain                               |
| 3            | +                   | 4                           | 38                          | 1                      | Cesarean section  | Moderna             | Local pain                               |
| 4            | +                   | 2                           | 33                          | 2                      | Cesarean section  | Pfizer              | Local pain                               |
| 5            | +                   | 25                          | 31                          | 1                      | Cesarean section  | Pfizer              | Local pain                               |
| 6            | +                   | 3                           | 36                          | 2                      | Cesarean section  | Pfizer              | Local pain                               |
| 7            | +                   | 2                           | 33                          | 2                      | Natural birth     | Pfizer              | Absent                                   |
| 8            | +                   | 33                          | 31                          | 1                      | Cesarean section  | Pfizer              | Generalized muscle pain, fever, headache |
| 9            | +                   | 12                          | 36                          | 2                      | Cesarean section  | Pfizer              | Local pain                               |
| 10           | +                   | 35                          | 31                          | 1                      | Natural birth     | Pfizer              | Local pain                               |
| 11           | +                   | 19                          | 35                          | 1                      | Cesarean section  | Pfizer              | Absent                                   |
| 12           | +                   | 4                           | 34                          | 2                      | Natural birth     | Pfizer              | Local pain                               |
| 13           | +                   | 10                          | 32                          | 1                      | Natural birth     | Pfizer              | Generalized muscle pain, fever, headache |
| 14           | +                   | 10                          | 32                          | 1                      | Cesarean section  | Pfizer              | Absent                                   |
| 15           | +                   | 18                          | 29                          | 1                      | Natural birth     | Pfizer              | Absent                                   |
| 16           | +                   | 20                          | 35                          | 2                      | Cesarean section  | Pfizer              | Local pain                               |
| 17           | +                   | 12                          | 35                          | 2                      | Cesarean section  | Pfizer              | Generalized muscle pain, fever, headache |
| 18           | +                   | 2                           | 37                          | 2                      | Cesarean section  | Moderna             | Local pain                               |
| 19           | +                   | 11                          | 34                          | 1                      | Cesarean section  | Pfizer              | Local pain                               |
| 20           | +                   | 4                           | 32                          | 1                      | Cesarean section  | Pfizer              | Local pain                               |
| 21           | +                   | 3                           | 30                          | 1                      | Cesarean section  | Pfizer              | Local pain                               |
| 22           | +                   | 22                          | 30                          | 1                      | Natural birth     | Pfizer              | Local pain                               |
| 23           | +                   | 15                          | 35                          | 1                      | Natural birth     | Pfizer              | Absent                                   |
| 24           | +                   | 12                          | 36                          | 2                      | Cesarean section  | Moderna             | Local pain                               |
| 25           | +                   | 17                          | 34                          | 1                      | Cesarean section  | Pfizer              | Local pain                               |
| 26           | +                   | 34                          | 32                          | 1                      | Cesarean section  | Pfizer              | Generalized muscle pain, fever, headache |

**Table S2. Characteristics of SARS – CoV – 2 infected mothers group**

| ID No | Anti-RBD IgG | Child's age (months) | Mother's age (years) | Mother's parity | Birth type       | Vaccine prior infection | Symptoms                                                                         | Hospitalization | Oxygen therapy |
|-------|--------------|----------------------|----------------------|-----------------|------------------|-------------------------|----------------------------------------------------------------------------------|-----------------|----------------|
| 1     | +            | 4                    | 37                   | 2               | Cesarean section | Yes                     | sore throat, asthenia                                                            | No              | No             |
| 2     | +            | 6                    | 35                   | 1               | Cesarean section | Yes                     | significant asthenia, altered general condition, cough, sore throat              | No              | No             |
| 3     | +            | 2                    | 31                   | 2               | Natural birth    | No                      | sore throat, fever, muscle pain                                                  | No              | No             |
| 4     | +            | 7                    | 30                   | 2               | Cesarean section | Yes                     | sore throat, lack of smell/taste                                                 | No              | No             |
| 5     | +            | 3                    | 32                   | 2               | Cesarean section | No                      | fever, muscle pain                                                               | No              | No             |
| 6     | +            | 11                   | 30                   | 1               | Natural birth    | Yes                     | significant asthenia, altered general condition, fever, cough, sore throat       | No              | No             |
| 7     | +            | 6                    | 36                   | 3               | Cesarean section | Yes                     | significant asthenia, altered general condition, fever                           | No              | No             |
| 8     | +            | 28                   | 31                   | 1               | Cesarean section | Yes                     | lack of smell/taste                                                              | No              | No             |
| 9     | +            | 21                   | 33                   | 2               | Natural birth    | No                      | sore throat, muscle pain                                                         | No              | No             |
| 10    | +            | 16                   | 35                   | 2               | Natural birth    | Yes                     | lack of smell/taste                                                              | No              | No             |
| 11    | +            | 33                   | 31                   | 1               | Natural birth    | Yes                     | lack of smell/taste, fever, muscle pain                                          | No              | No             |
| 12    | +            | 24                   | 32                   | 1               | Cesarean section | No                      | significant asthenia, altered general condition, cough, sore throat, muscle pain | No              | No             |
| 13    | +            | 14                   | 38                   | 3               | Natural birth    | Yes                     | significant asthenia, altered general condition, cough, fever, muscle pain       | No              | No             |
| 14    | +            | 9                    | 32                   | 1               | Cesarean section | Yes                     | significant asthenia, altered general condition, cough, fever                    | No              | No             |
| 15    | +            | 20                   | 36                   | 2               | Cesarean section | Yes                     | sore throat, muscle pain                                                         | No              | No             |
| 16    | +            | 13                   | 29                   | 2               | Cesarean section | No                      | sore throat, fever                                                               | No              |                |

|    |   |    |    |   |                  |     |                                                                     |    |  |
|----|---|----|----|---|------------------|-----|---------------------------------------------------------------------|----|--|
| 17 | + | 21 | 28 | 2 | Natural birth    | No  | significant asthenia, altered general condition, cough, fever       | No |  |
| 18 | + | 13 | 32 | 2 | Cesarean section | Yes | significant asthenia, altered general condition, cough, fever       | No |  |
| 19 | + | 16 | 38 | 2 | Natural birth    | Yes | sore throat, fever, muscle pain                                     | No |  |
| 20 | + | 4  | 36 | 2 | Cesarean section | Yes | sore throat, lack of smell/taste                                    | No |  |
| 21 | + | 7  | 32 | 1 | Cesarean section | Yes | significant asthenia, altered general condition, fever, muscle pain | No |  |
| 22 | + | 8  | 31 | 1 | Cesarean section | Yes | sore throat, fever, lack of smell/taste                             | No |  |

**Table S3. Characteristics of the control group**

| <b>ID No</b> | <b>Anti-RBD IgG</b> | <b>Child`s age (months)</b> | <b>Mother`s age (years)</b> | <b>Mother`s parity</b> | <b>Birth type</b> |
|--------------|---------------------|-----------------------------|-----------------------------|------------------------|-------------------|
| 1            | -                   | 9                           | 32                          | 2                      | Natural birth     |
| 2            | -                   | 13                          | 29                          | 2                      | Cesarean section  |
| 3            | -                   | 24                          | 33                          | 2                      | Natural birth     |
| 4            | -                   | 9                           | 34                          | 2                      | Cesarean section  |
| 5            | -                   | 12                          | 30                          | 2                      | Cesarean section  |
| 6            | -                   | 5                           | 31                          | 1                      | Natural birth     |
| 7            | -                   | 2                           | 33                          | 3                      | Cesarean section  |
| 8            | -                   | 16                          | 33                          | 1                      | Natural birth     |
| 9            | -                   | 3                           | 36                          | 2                      | Natural birth     |
| 10           | -                   | 7                           | 30                          | 2                      | Natural birth     |
| 11           | +                   | 8                           | 36                          | 2                      | Cesarean section  |
| 12           | +                   | 26                          | 35                          | 2                      | Cesarean section  |
| 13           | +                   | 2                           | 32                          | 1                      | Natural birth     |
| 14           | +                   | 2                           | 31                          | 2                      | Natural birth     |
| 15           | +                   | 19                          | 29                          | 3                      | Natural birth     |
| 16           | +                   | 11                          | 44                          | 3                      | Natural birth     |
| 17           | +                   | 8                           | 31                          | 1                      | Natural birth     |

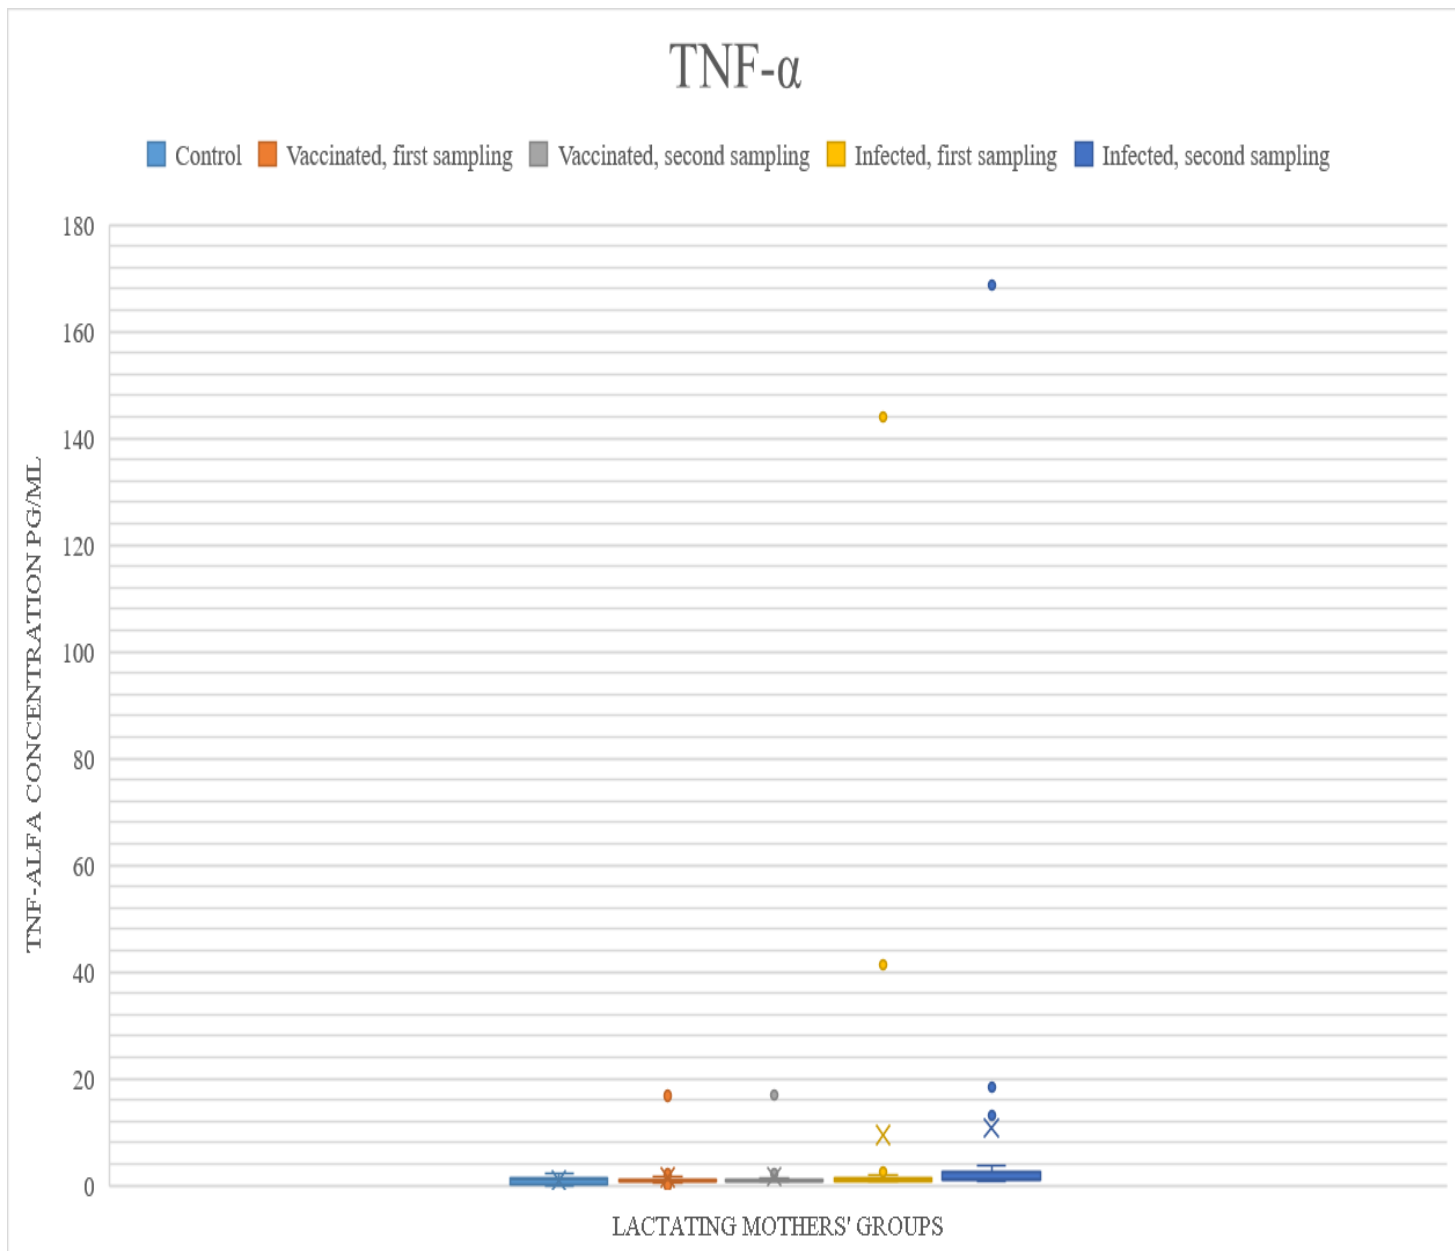

**Figure S1: TNF- $\alpha$  concentrations range according to each study group**

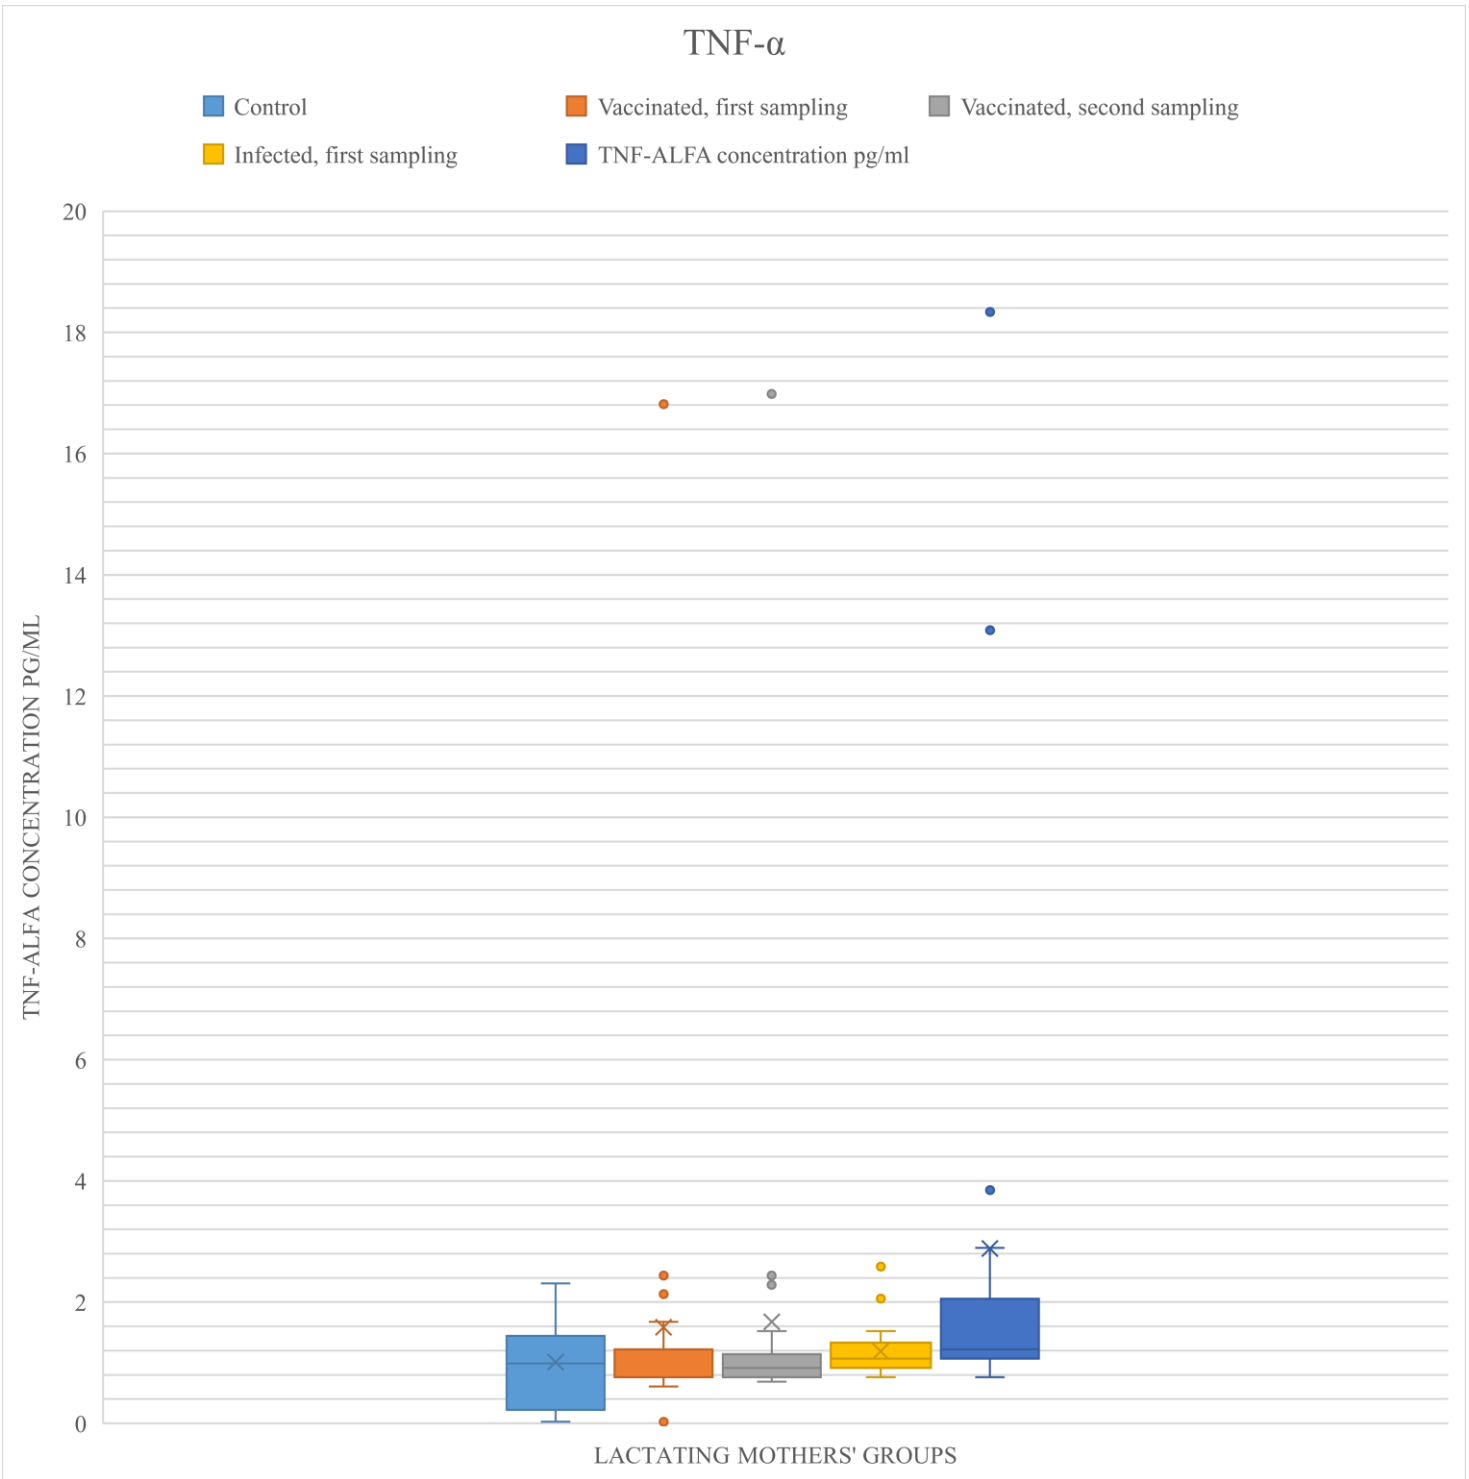

**Figure S2: TNF- $\alpha$  concentrations range according to each study group, without extreme outliers for a better visibility**

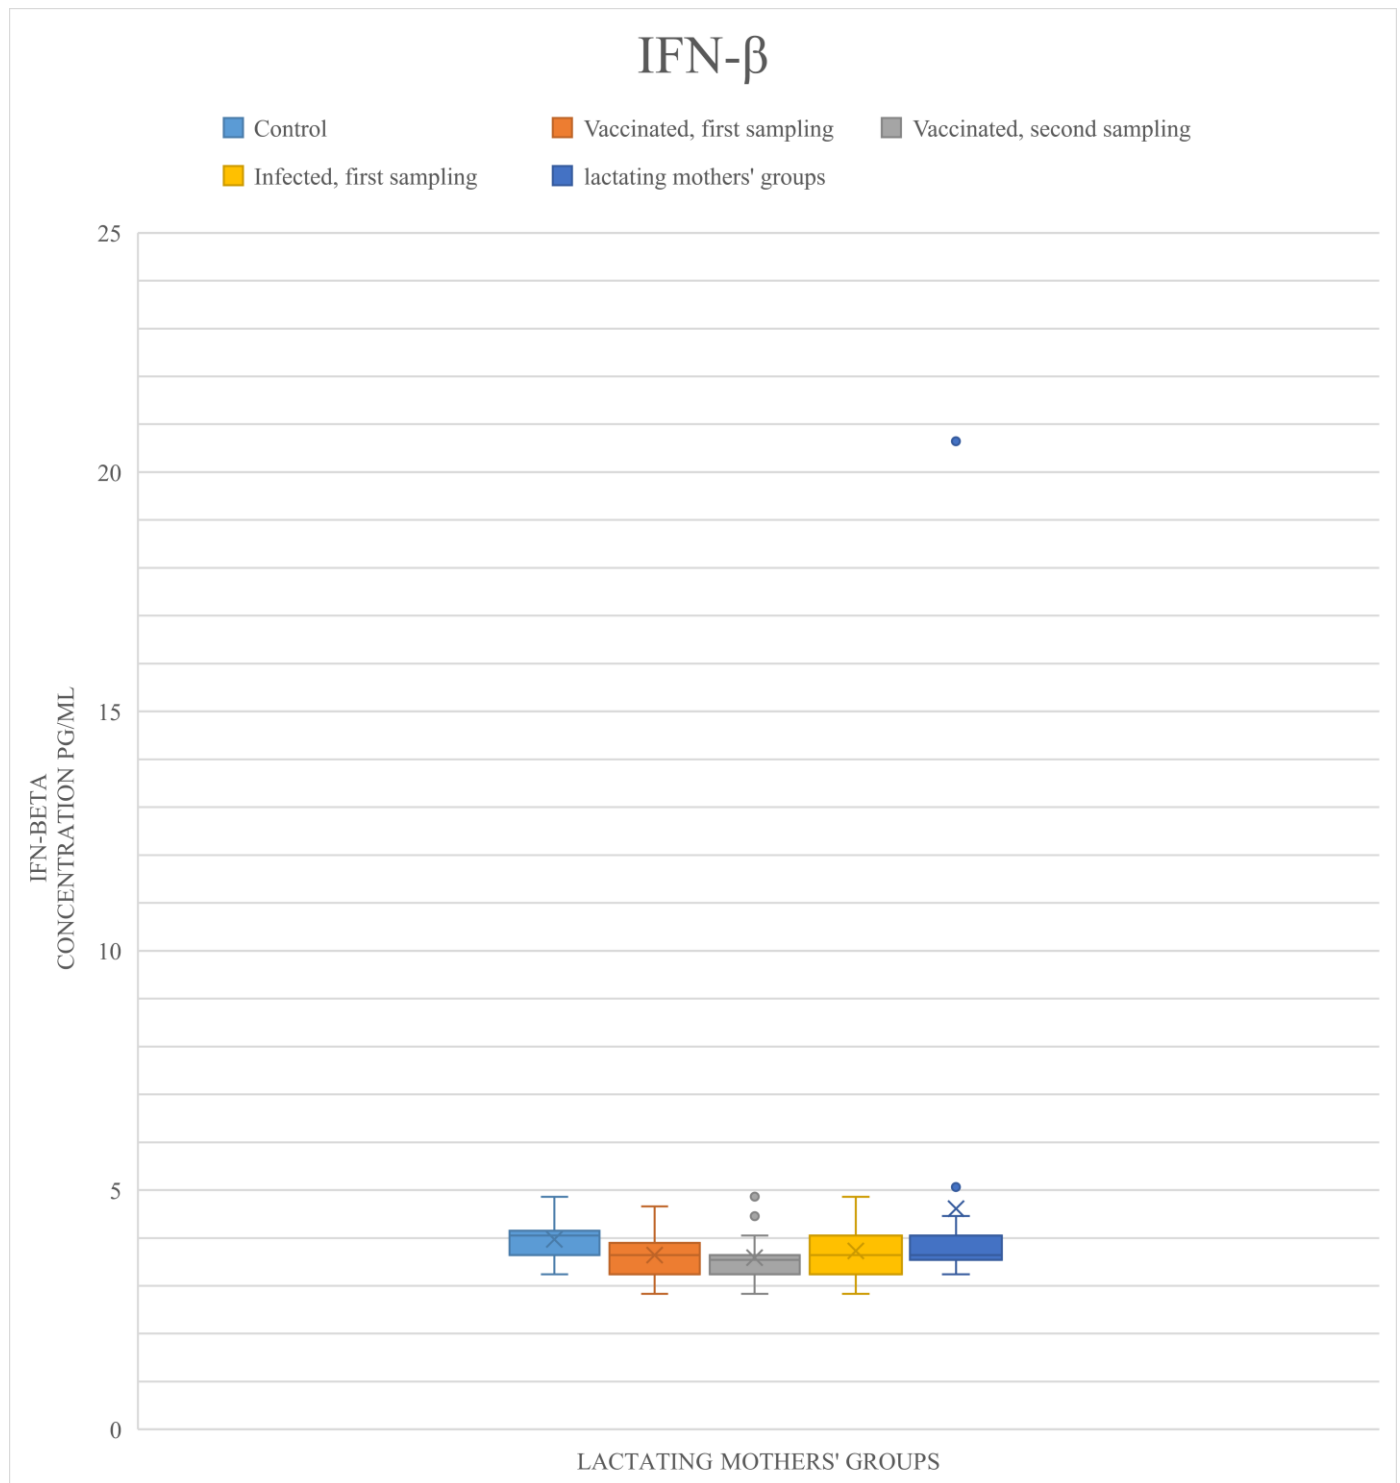

**Figure S3: IFN- $\beta$  concentrations range according to each study group**

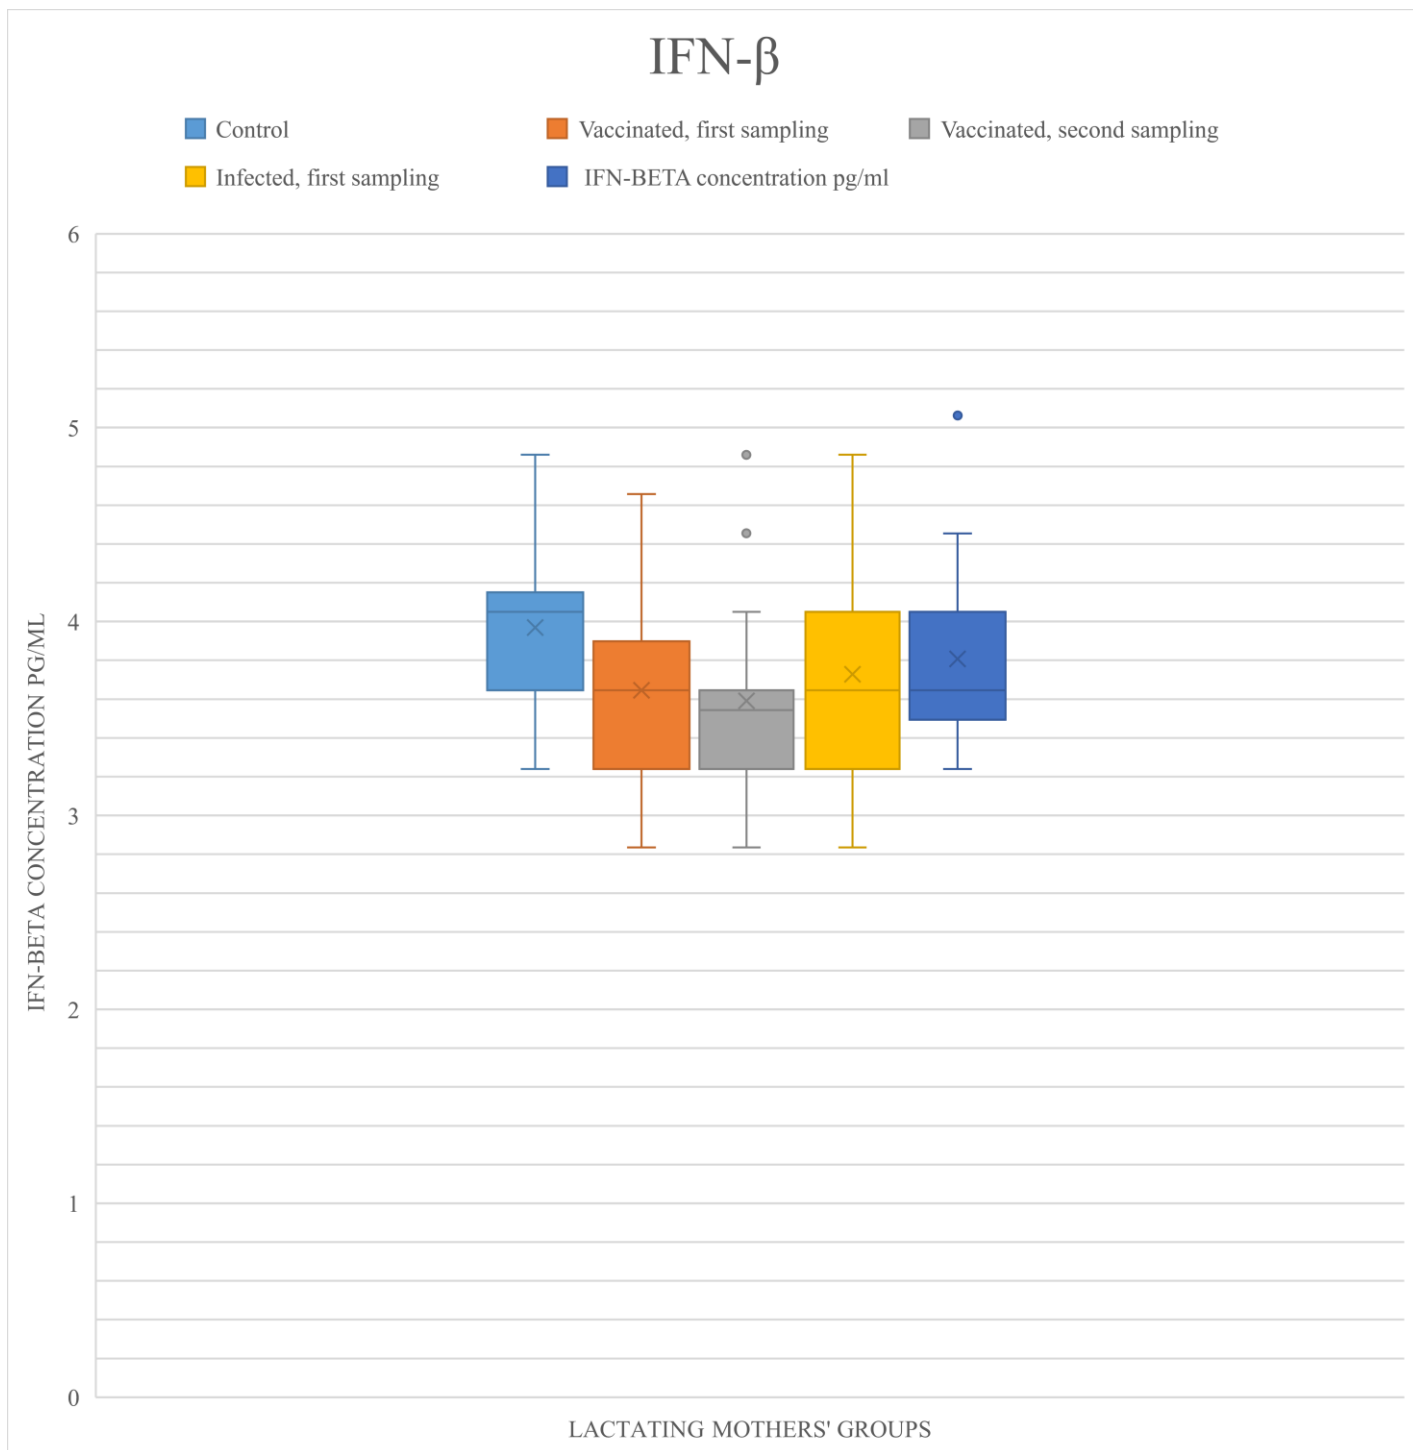

**Figure S4: IFN- $\beta$  concentrations range according to each study group, without extreme outliers for a better visibility**

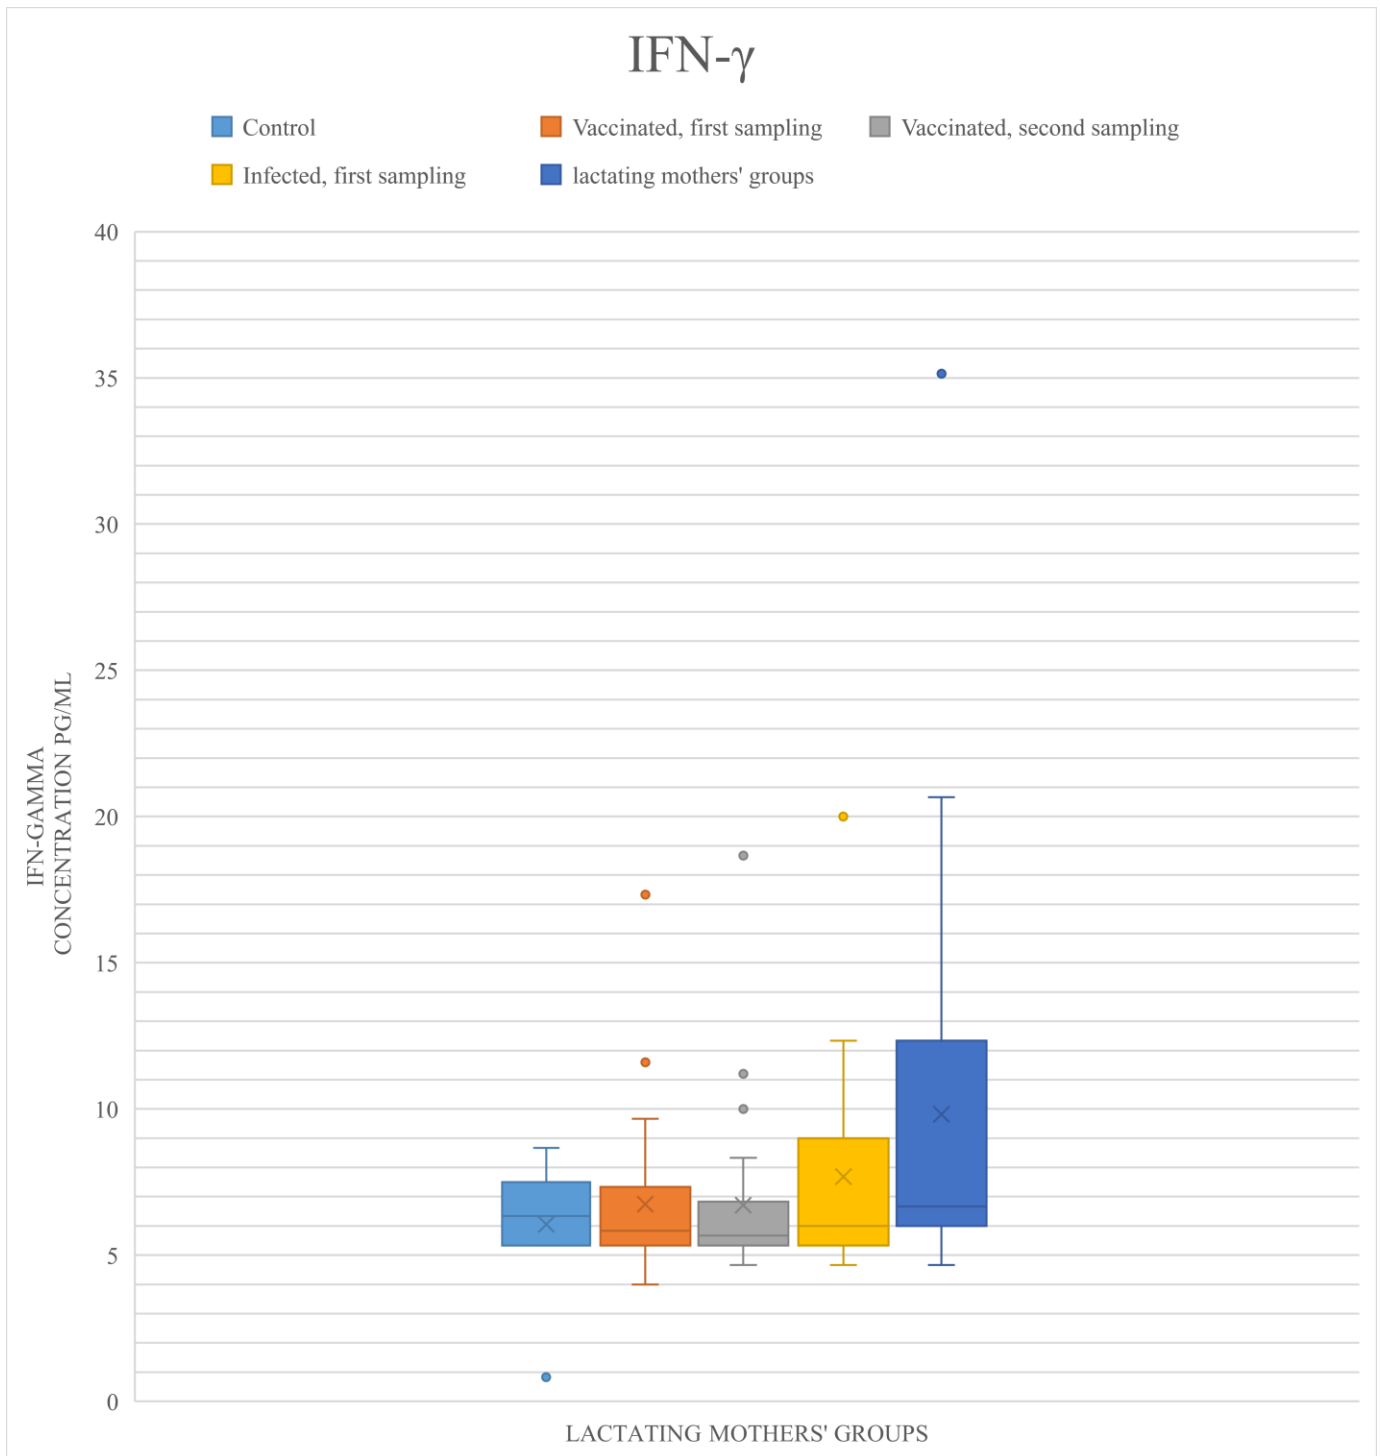

**Figure S5: IFN- $\gamma$  concentrations range according to each study group**



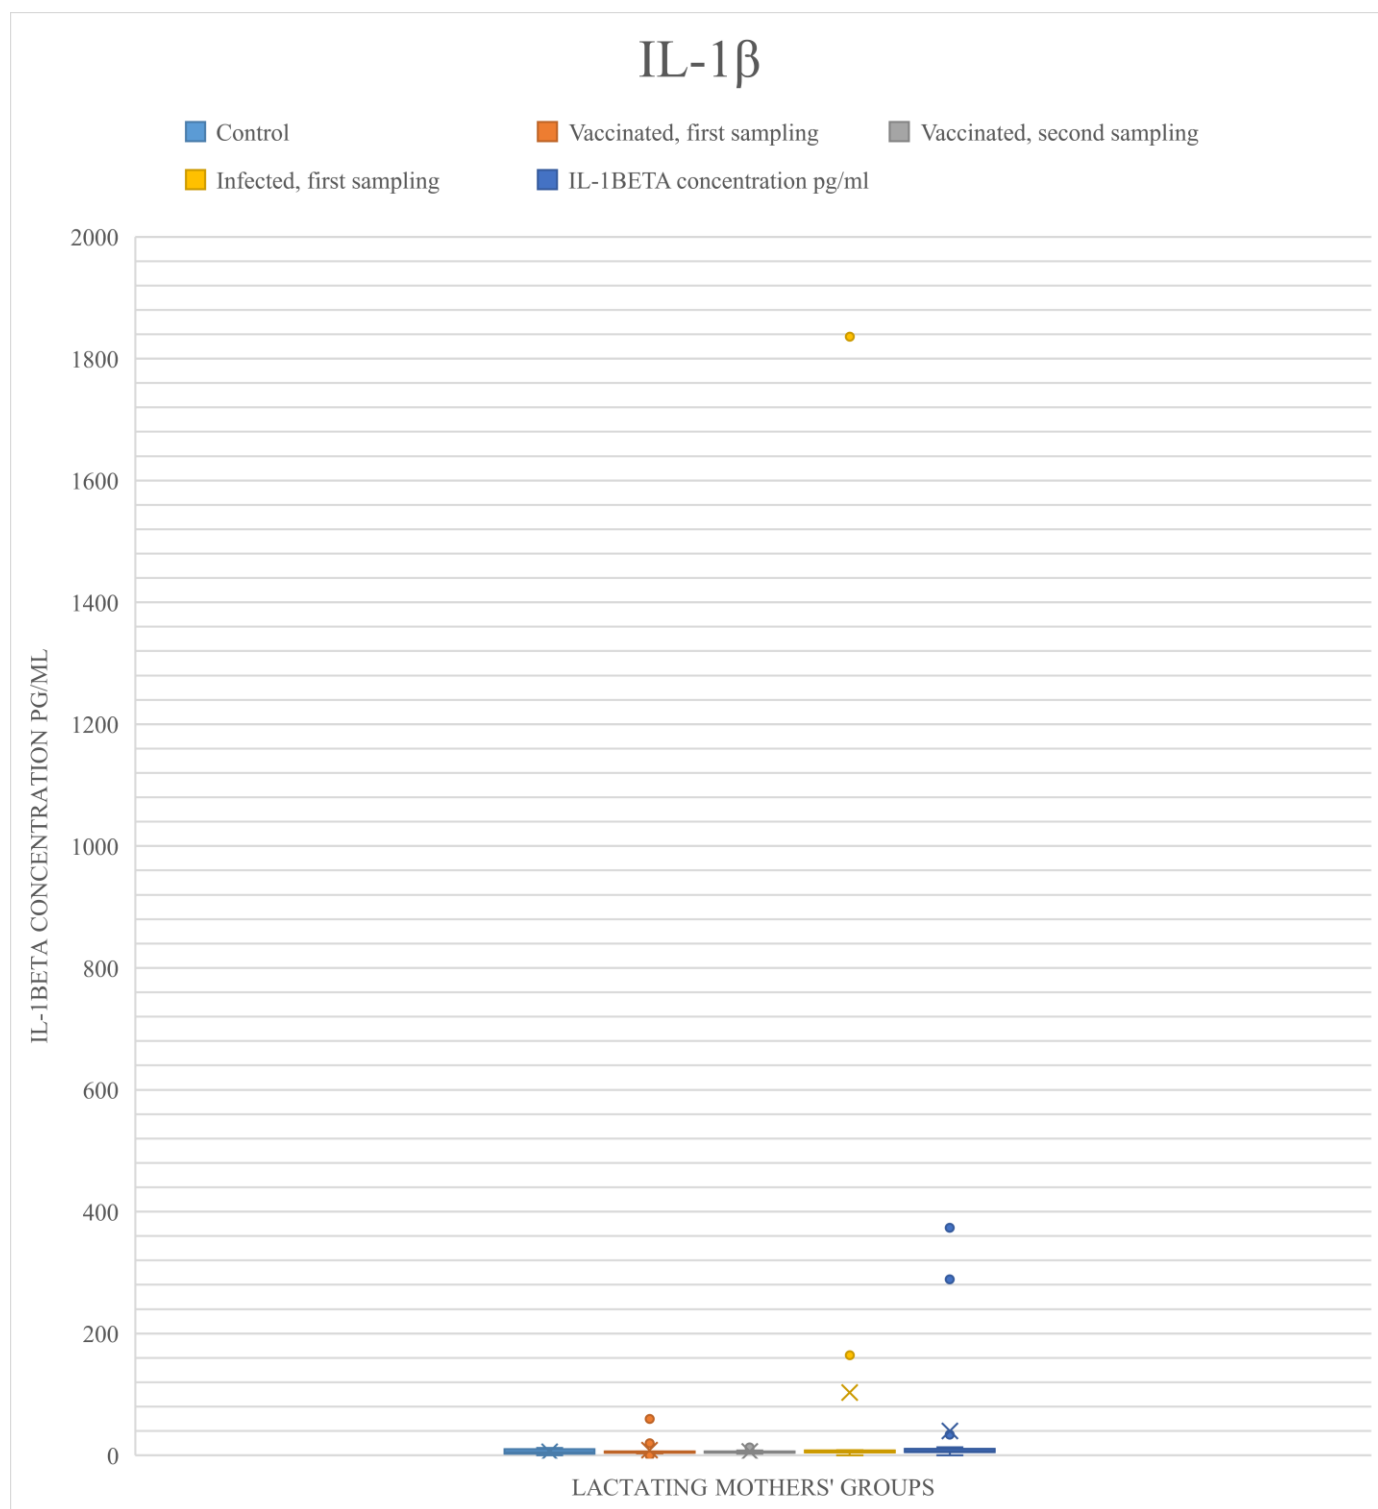

**Figure S6: IL-1 $\beta$  concentrations range according to each study group**

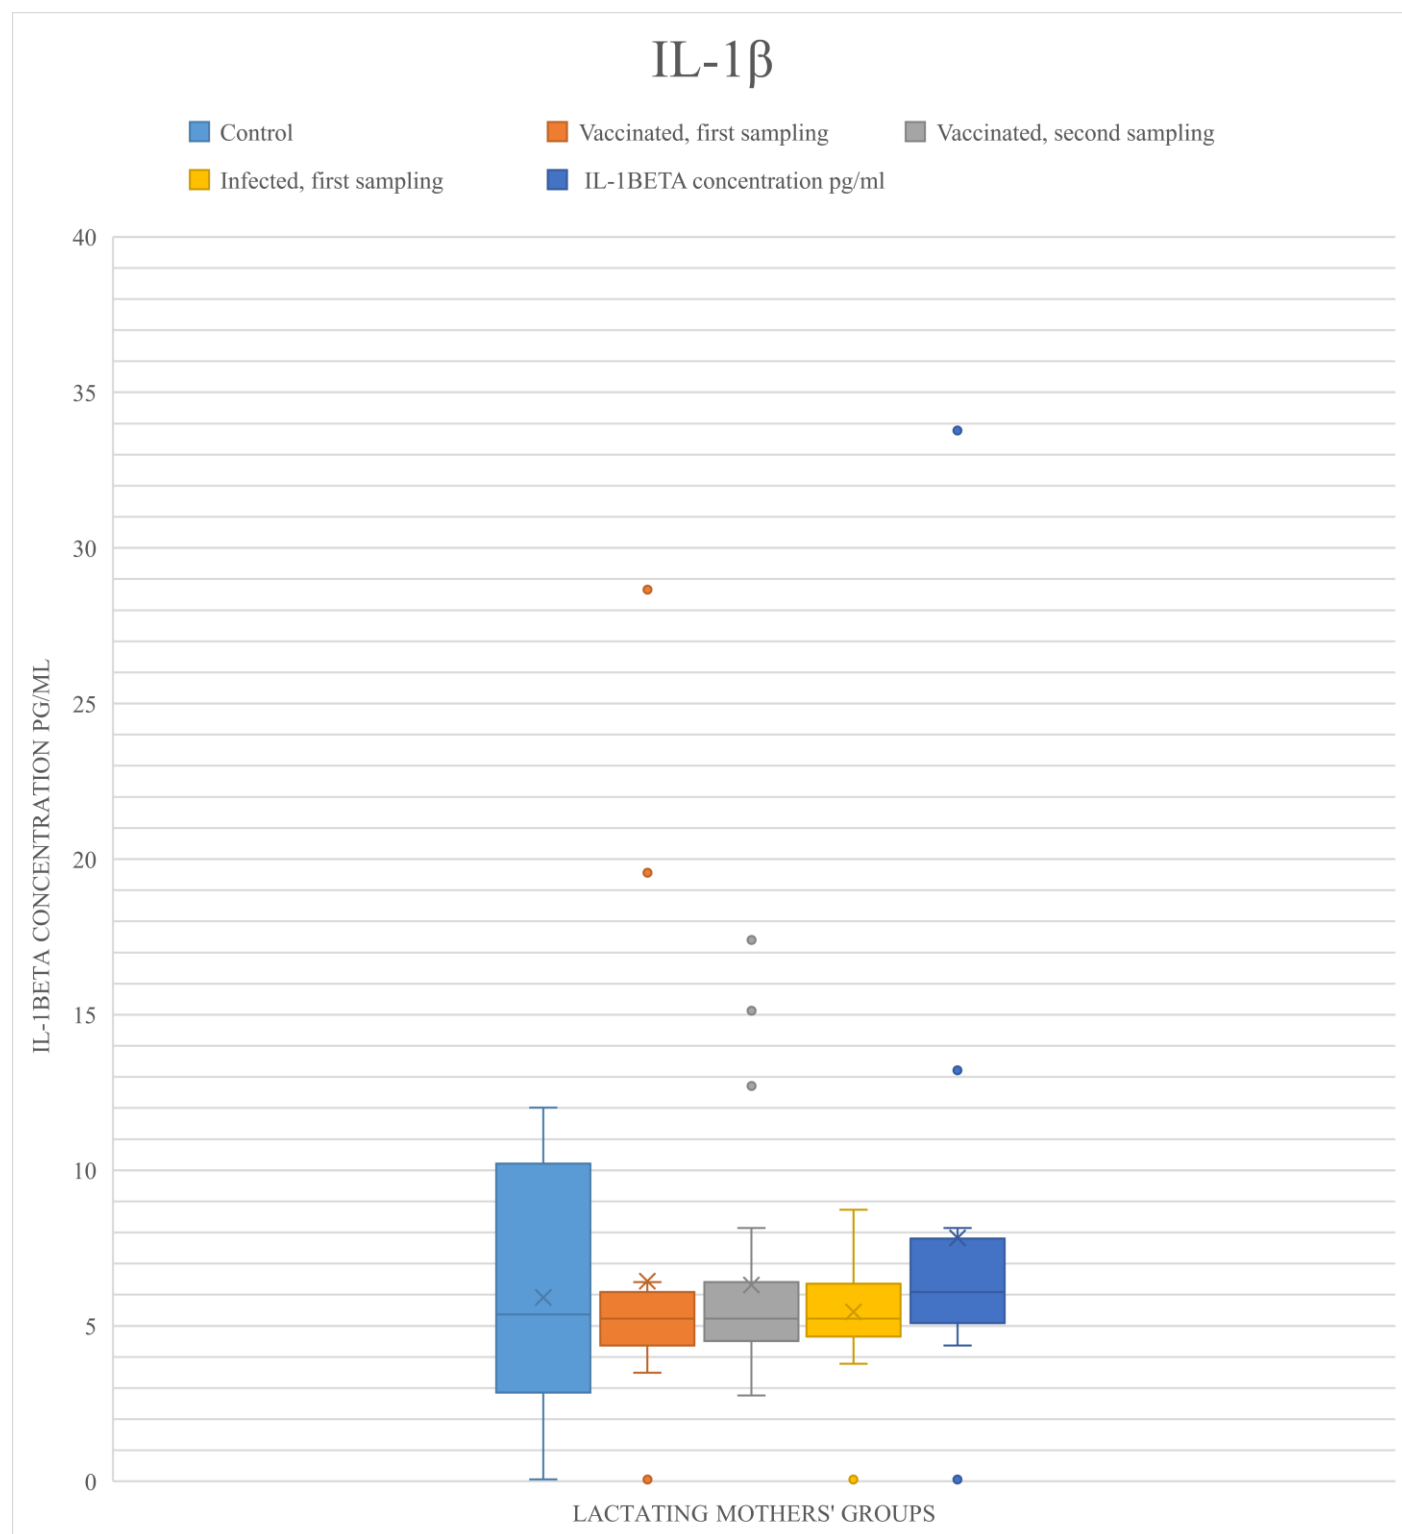

**Figure S7: IL-1 $\beta$  concentrations range according to each study group, without extreme outliers for a better visibility**

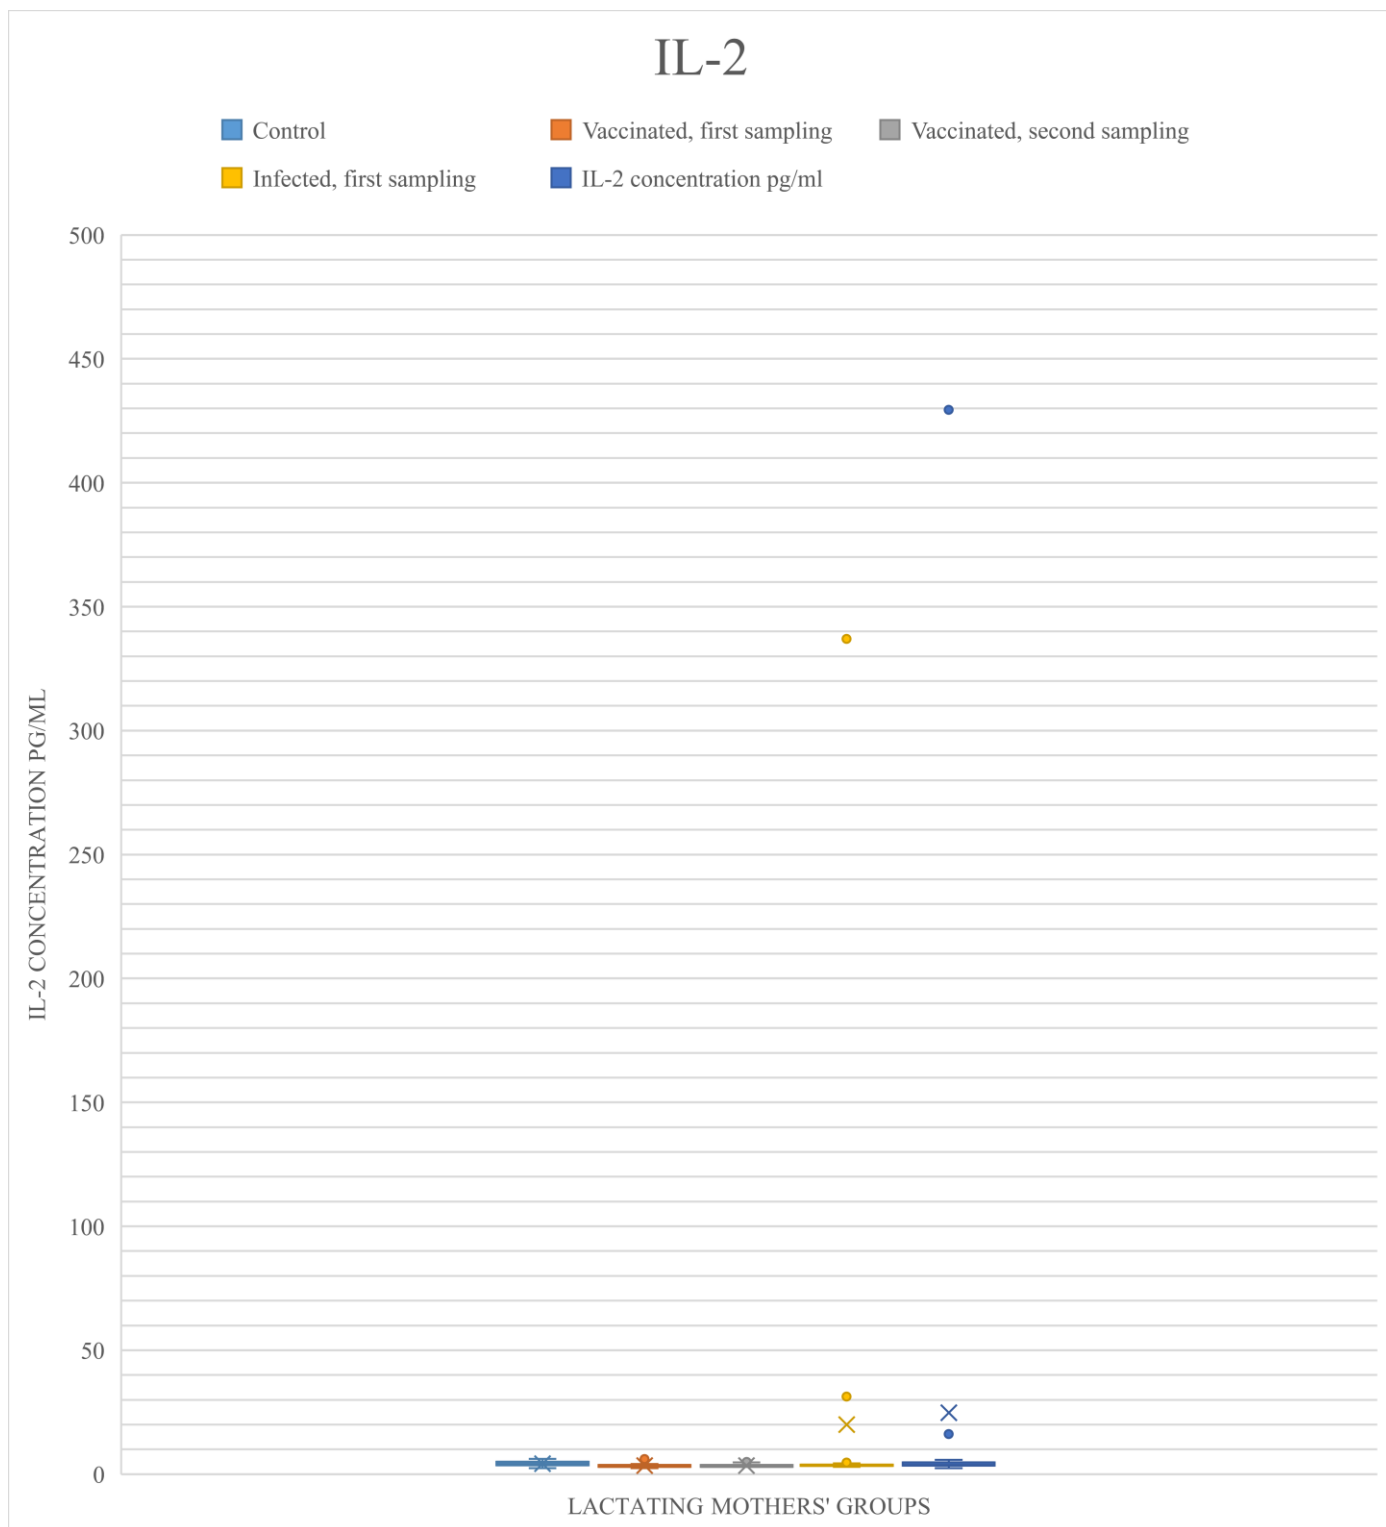

**Figure S8: IL-2 concentrations range according to each study group**

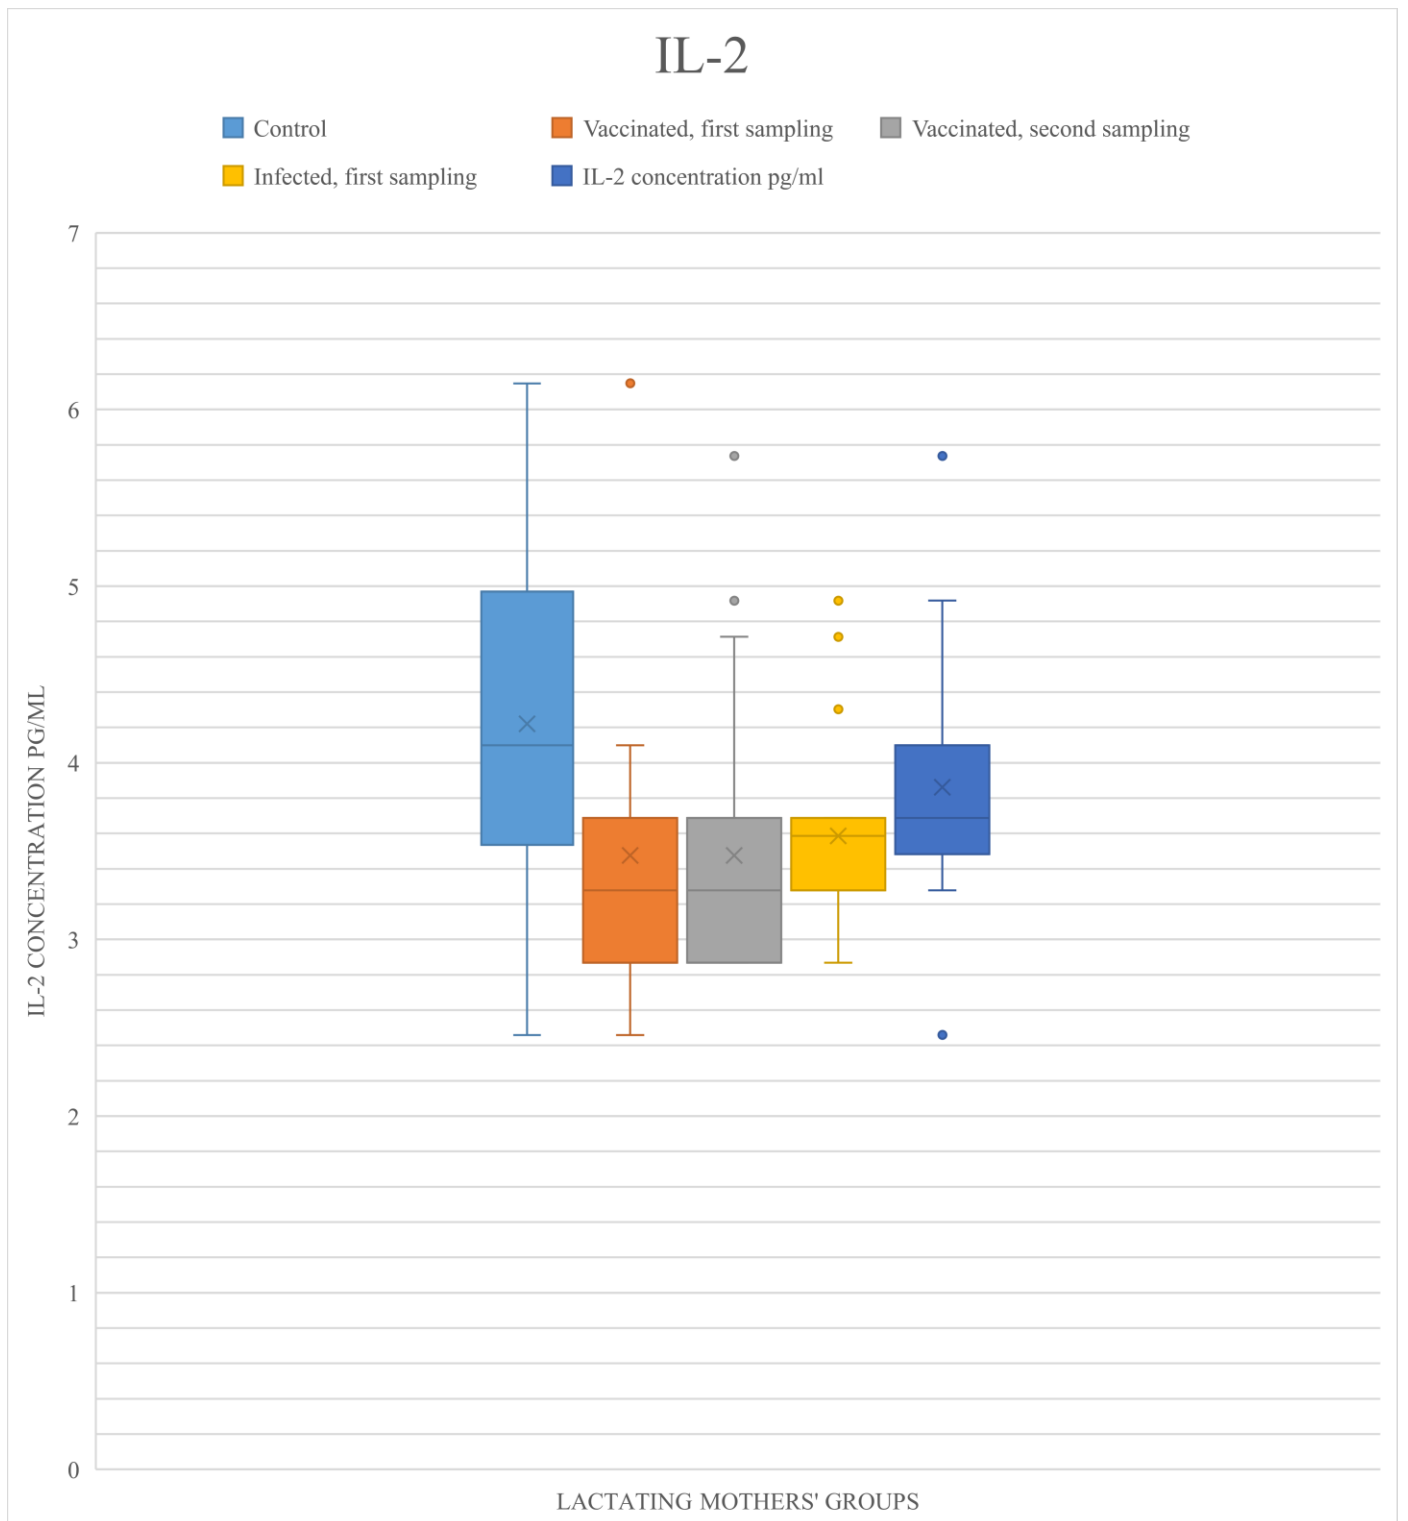

**Figure S9: IL-2 concentrations range according to each study group, without extreme outliers for a better visibility**

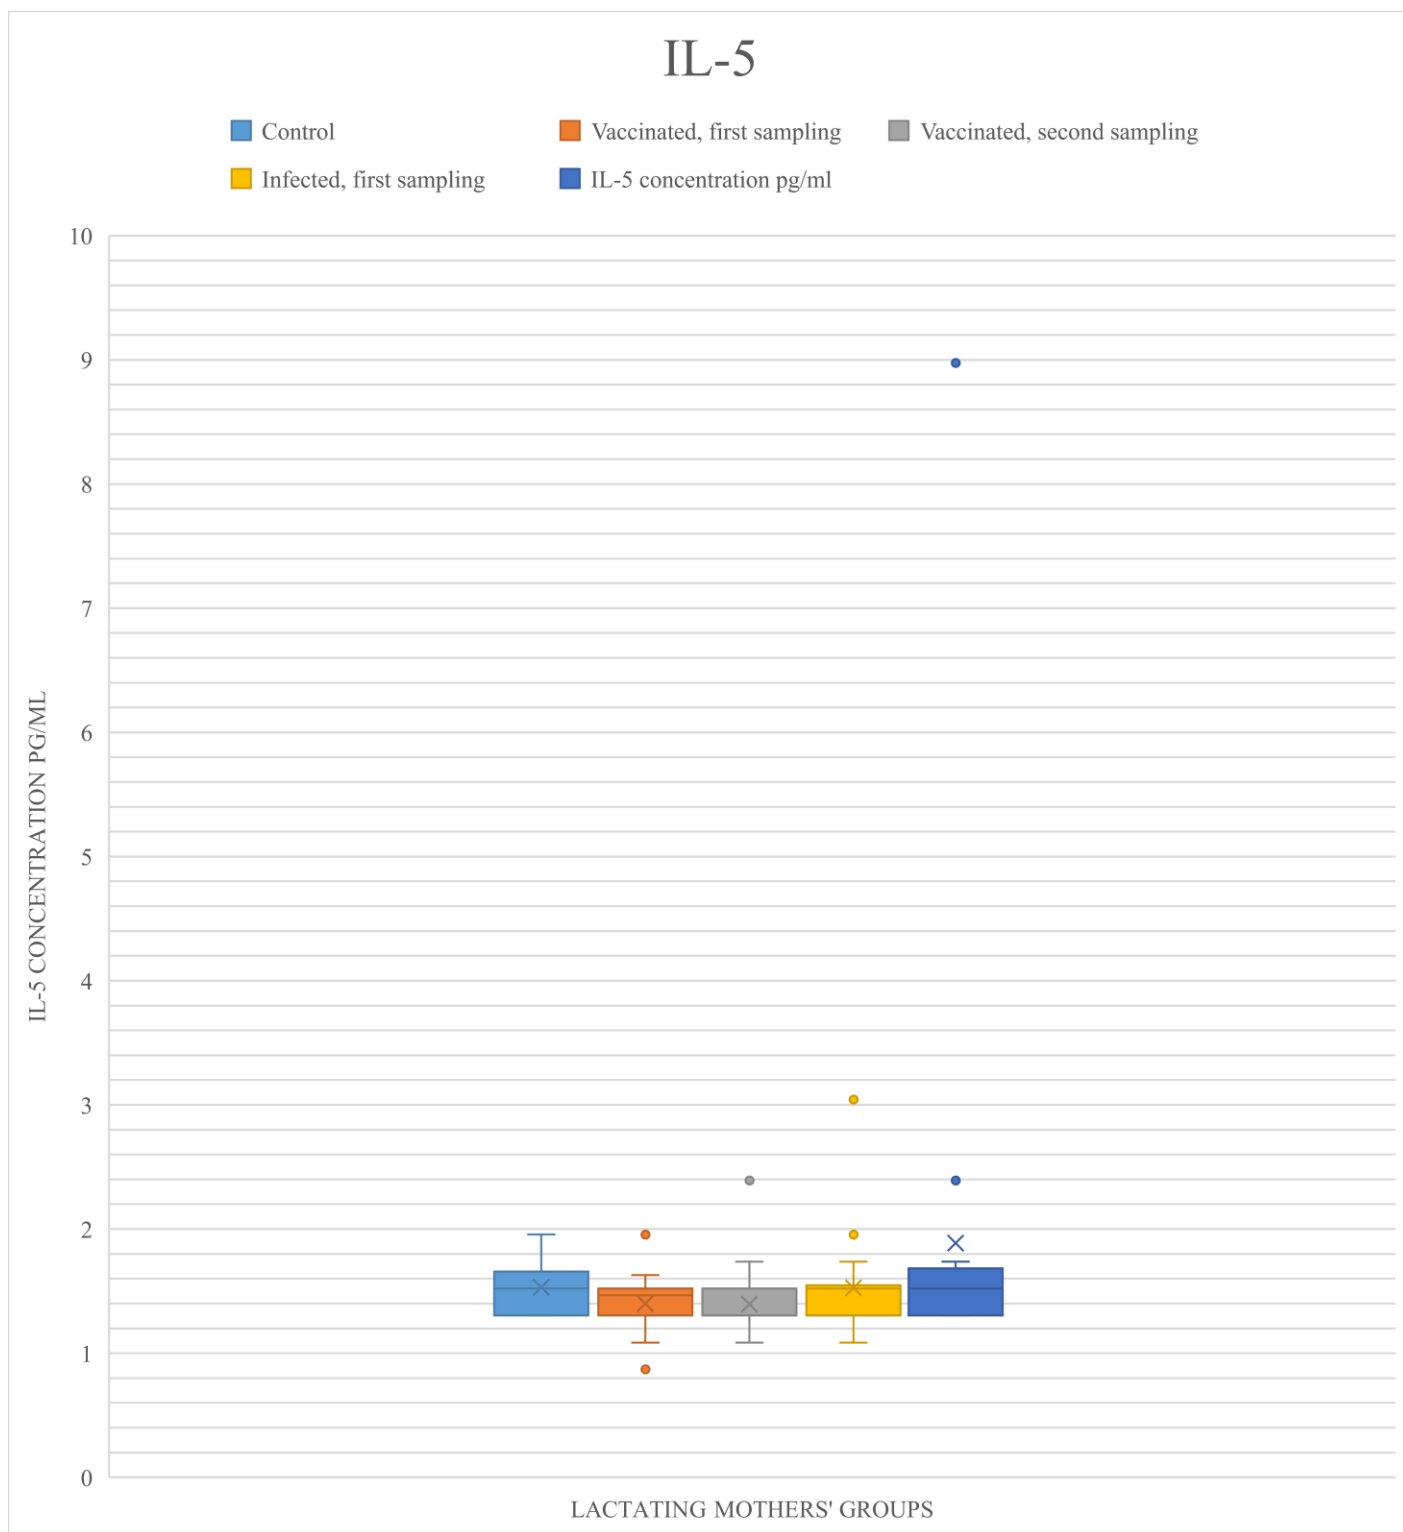

**Figure S10: IL-5 concentrations range according to each study group**

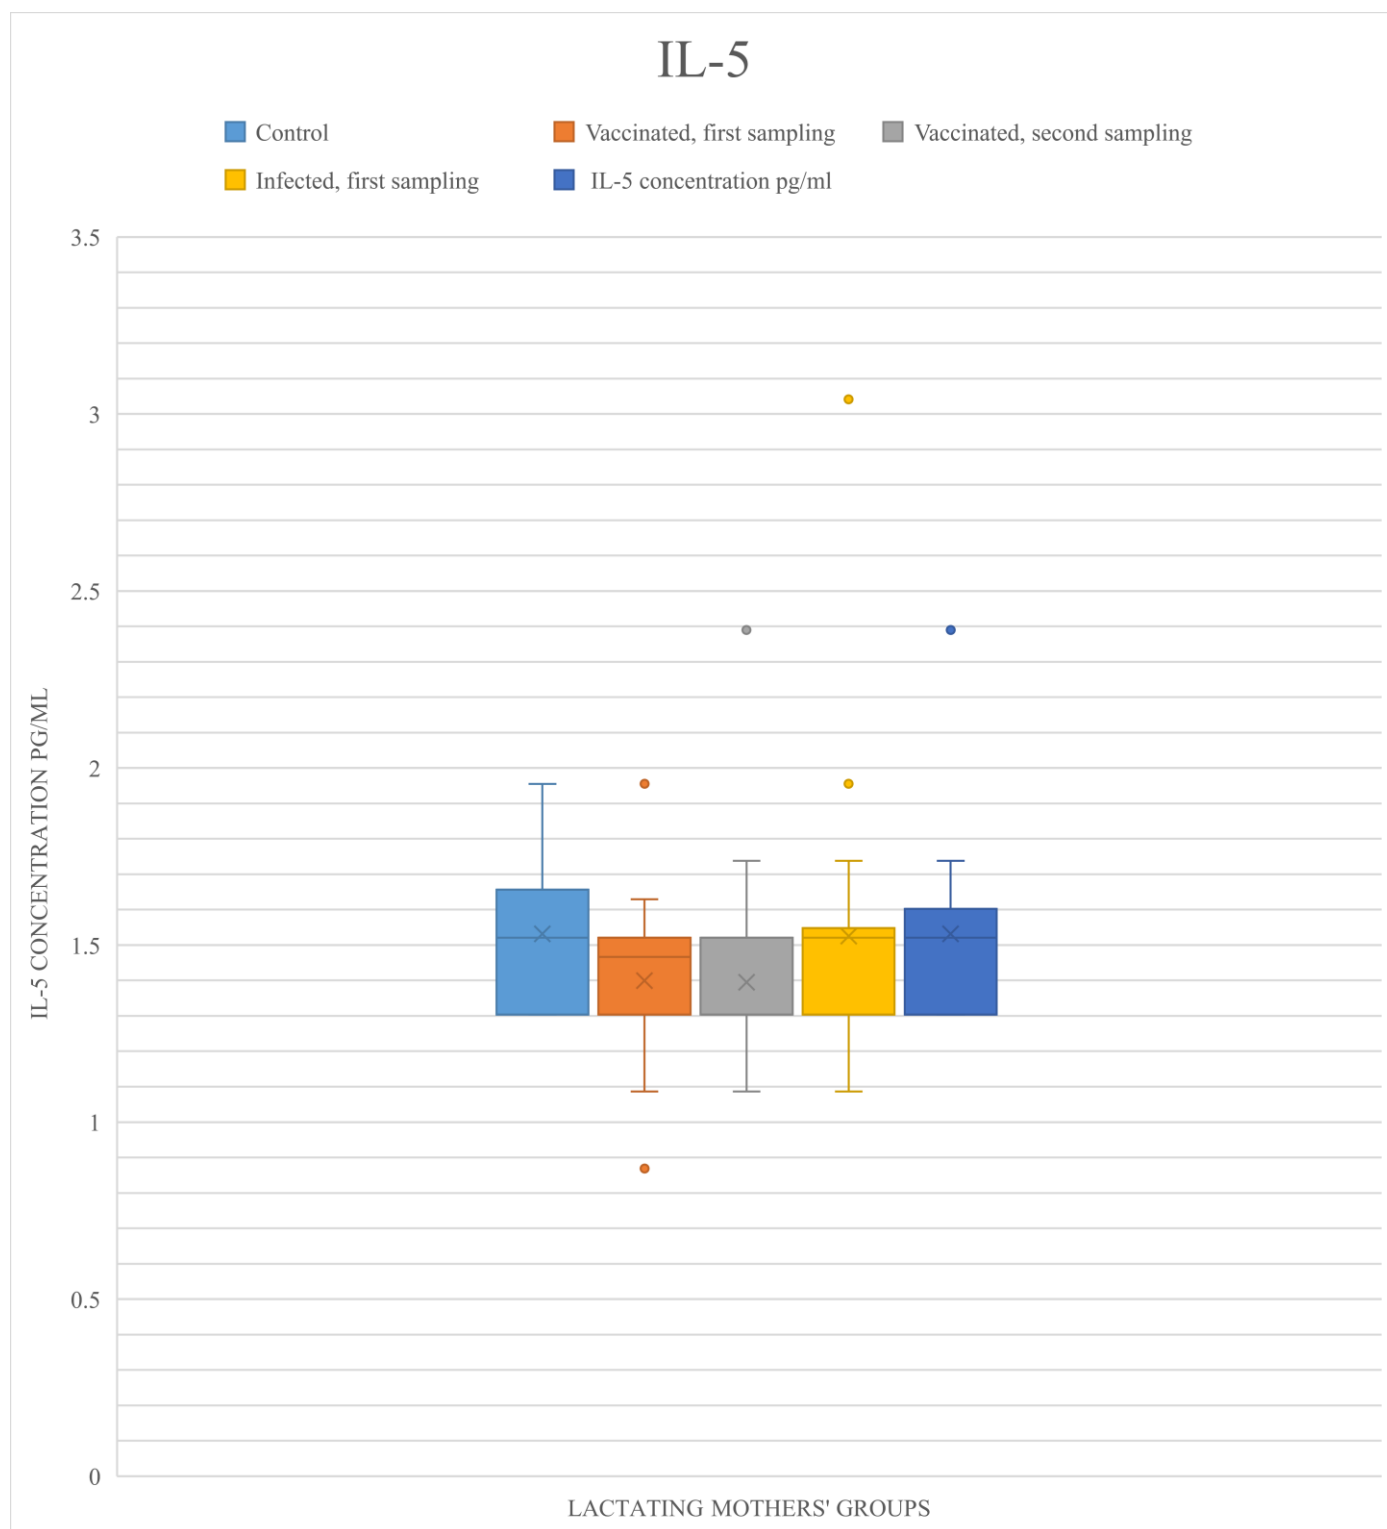

**Figure S11: IL-5 concentrations range according to each study group, without extreme outliers for a better visibility**



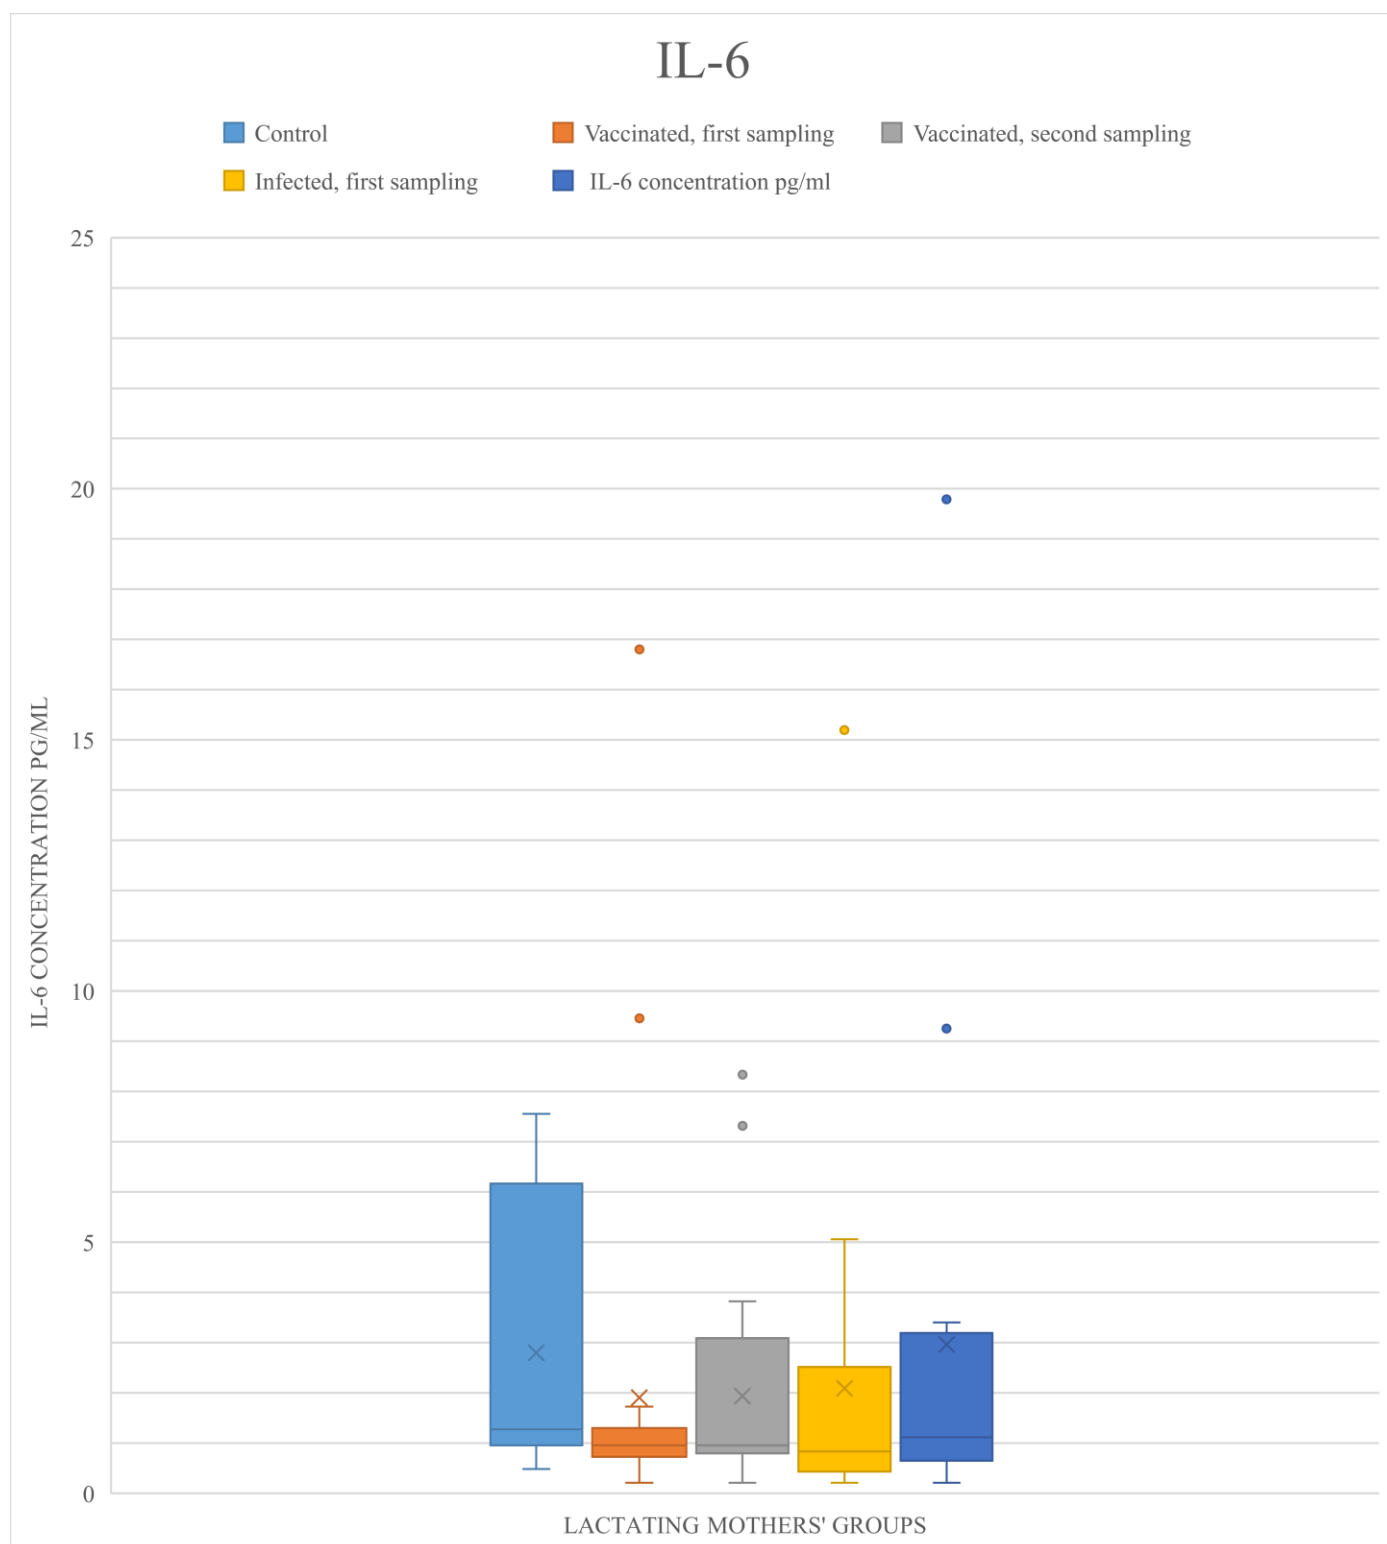

**Figure S13: IL-6 concentrations range according to each study group, without extreme outliers for a better visibility**



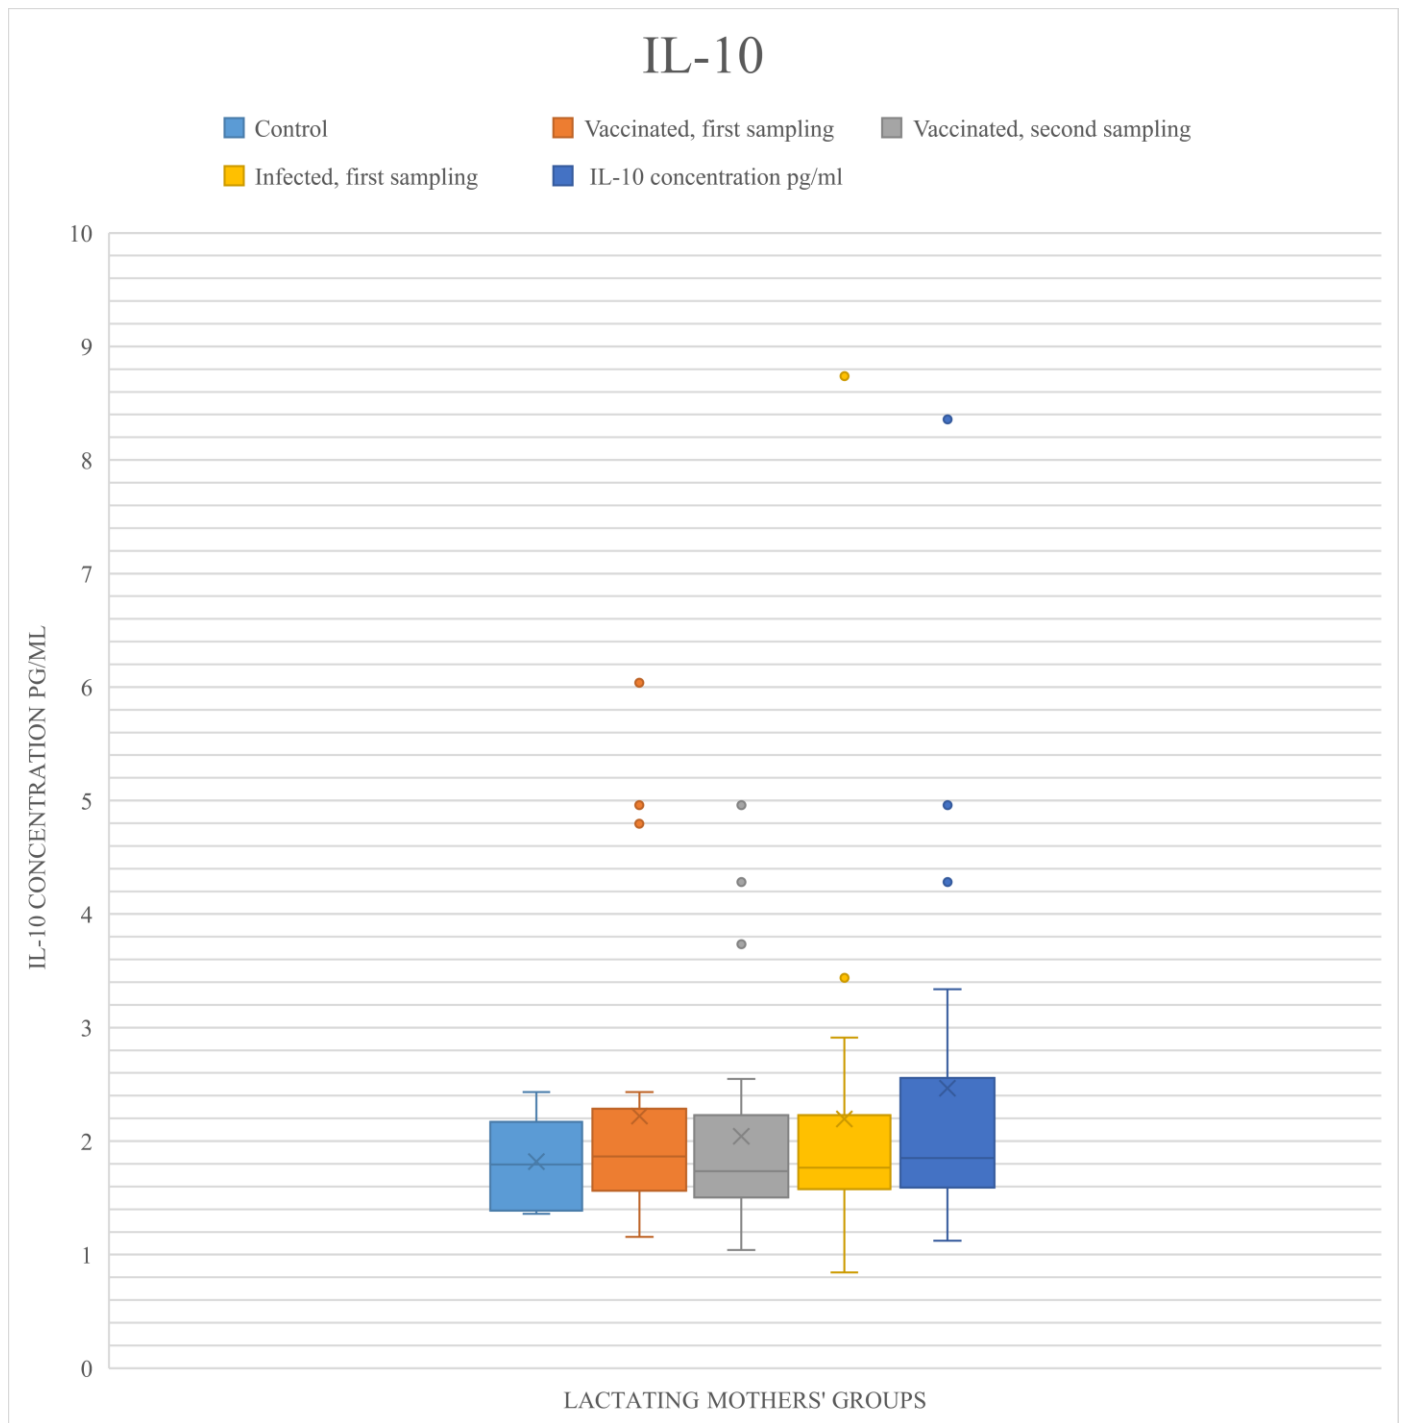

**Figure S14: IL-10 concentrations range according to each study group**

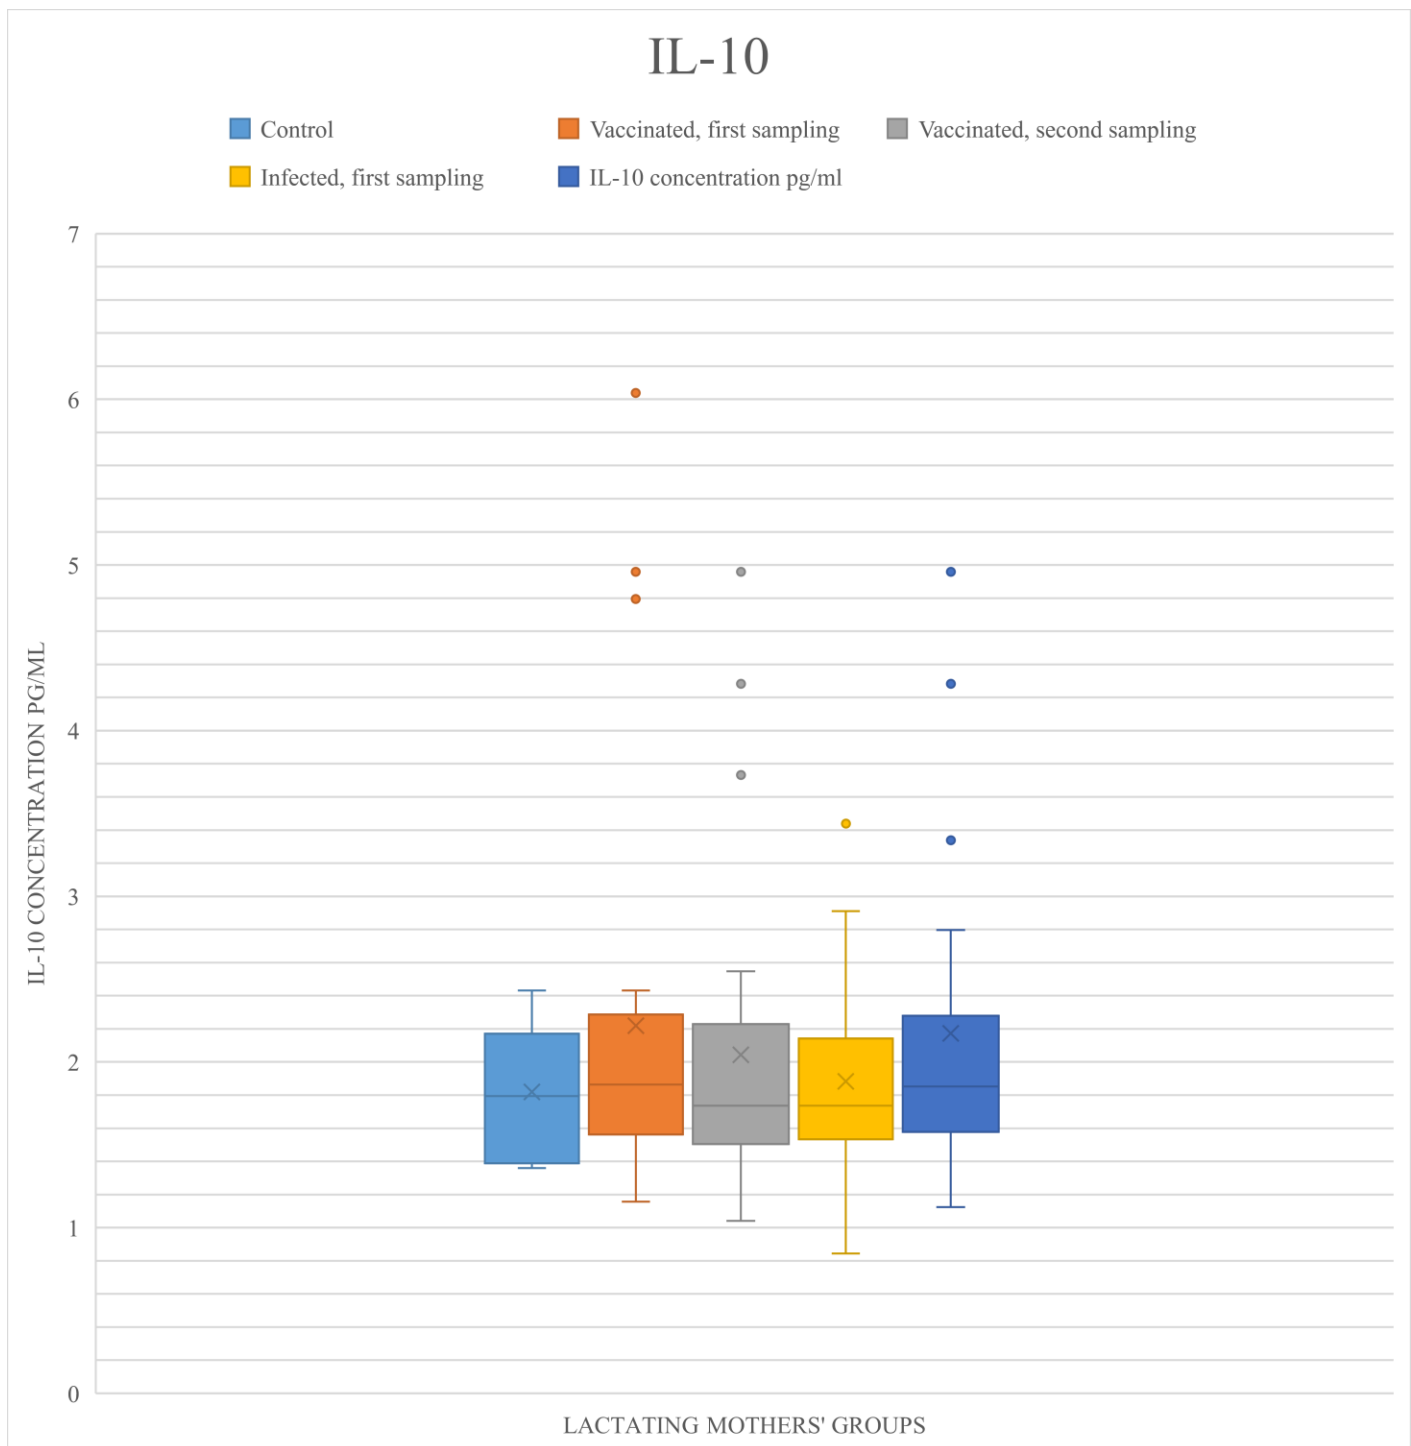

**Figure S15: IL-10 concentrations range according to each study group, without extreme outliers for a better visibility**

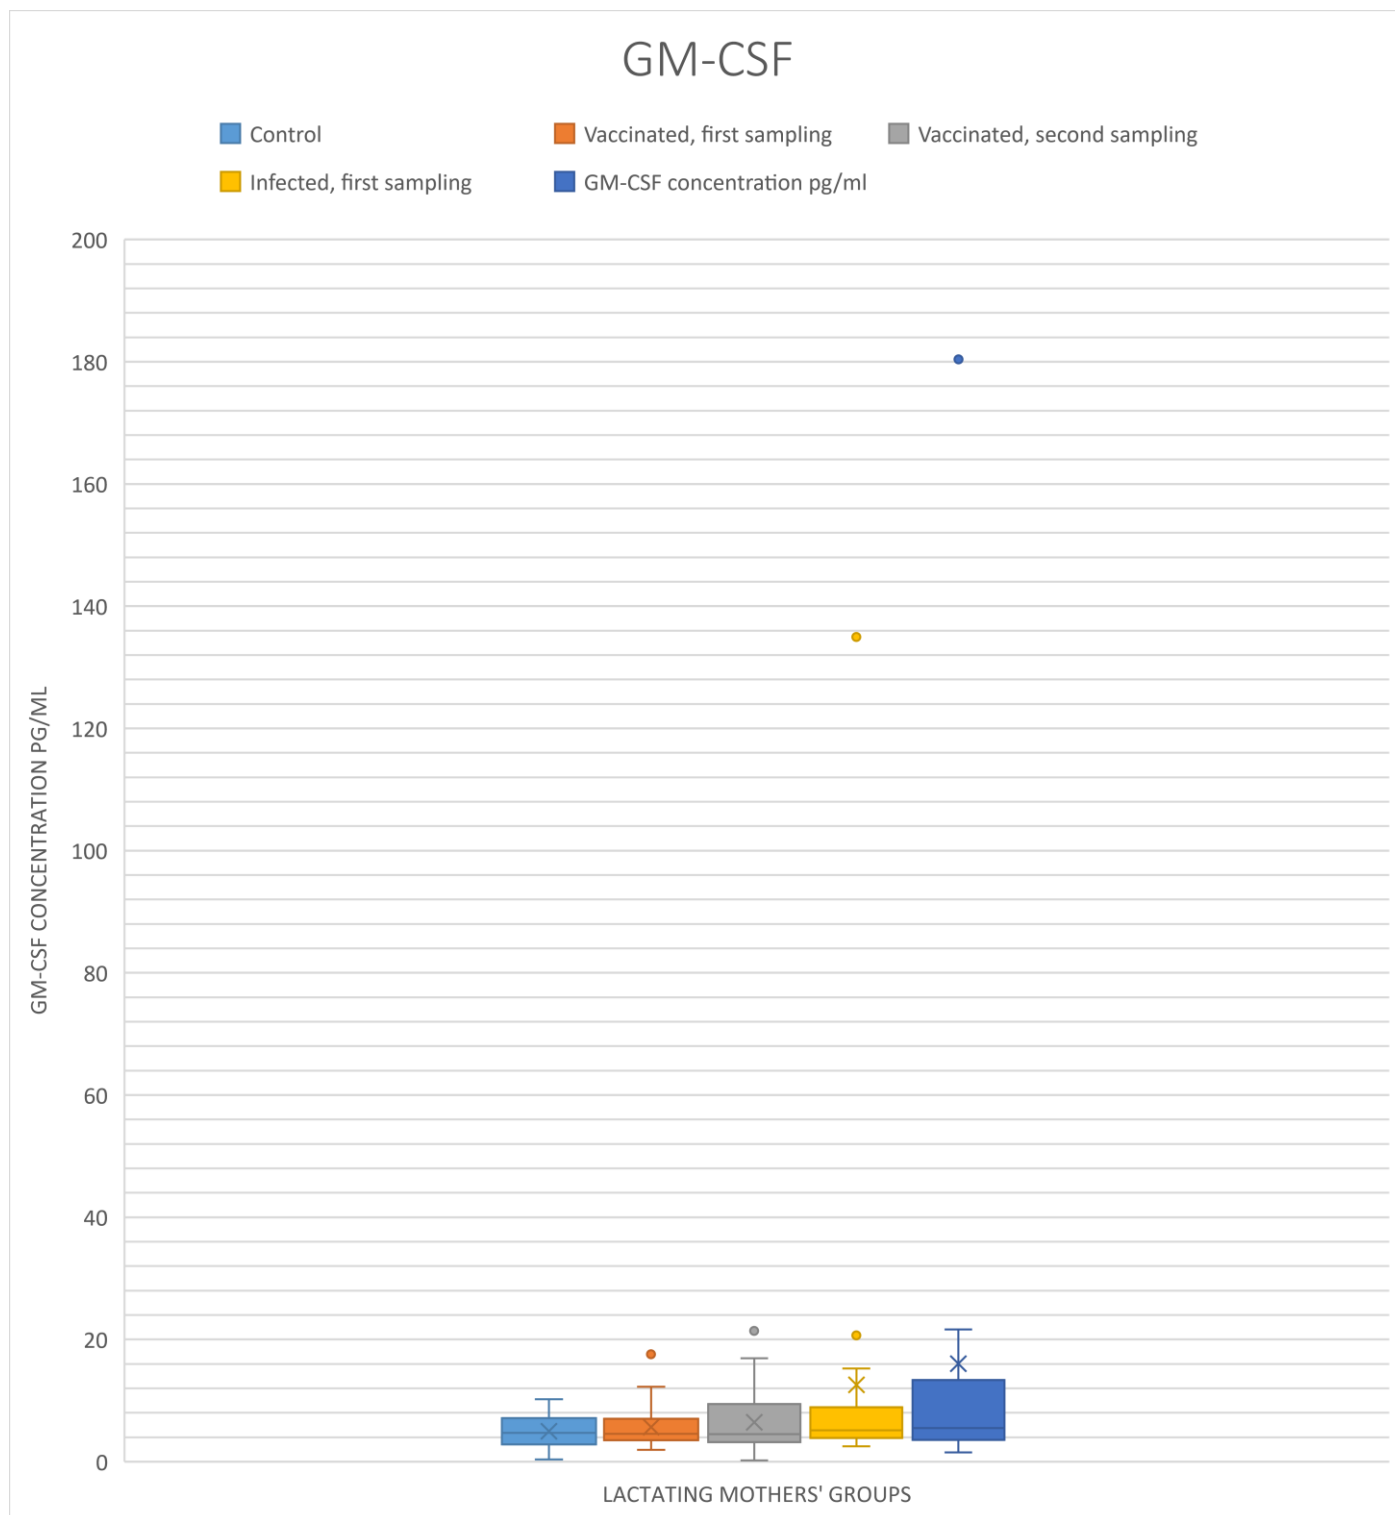

**Figure S16: GM-CSF concentrations range according to each study group**

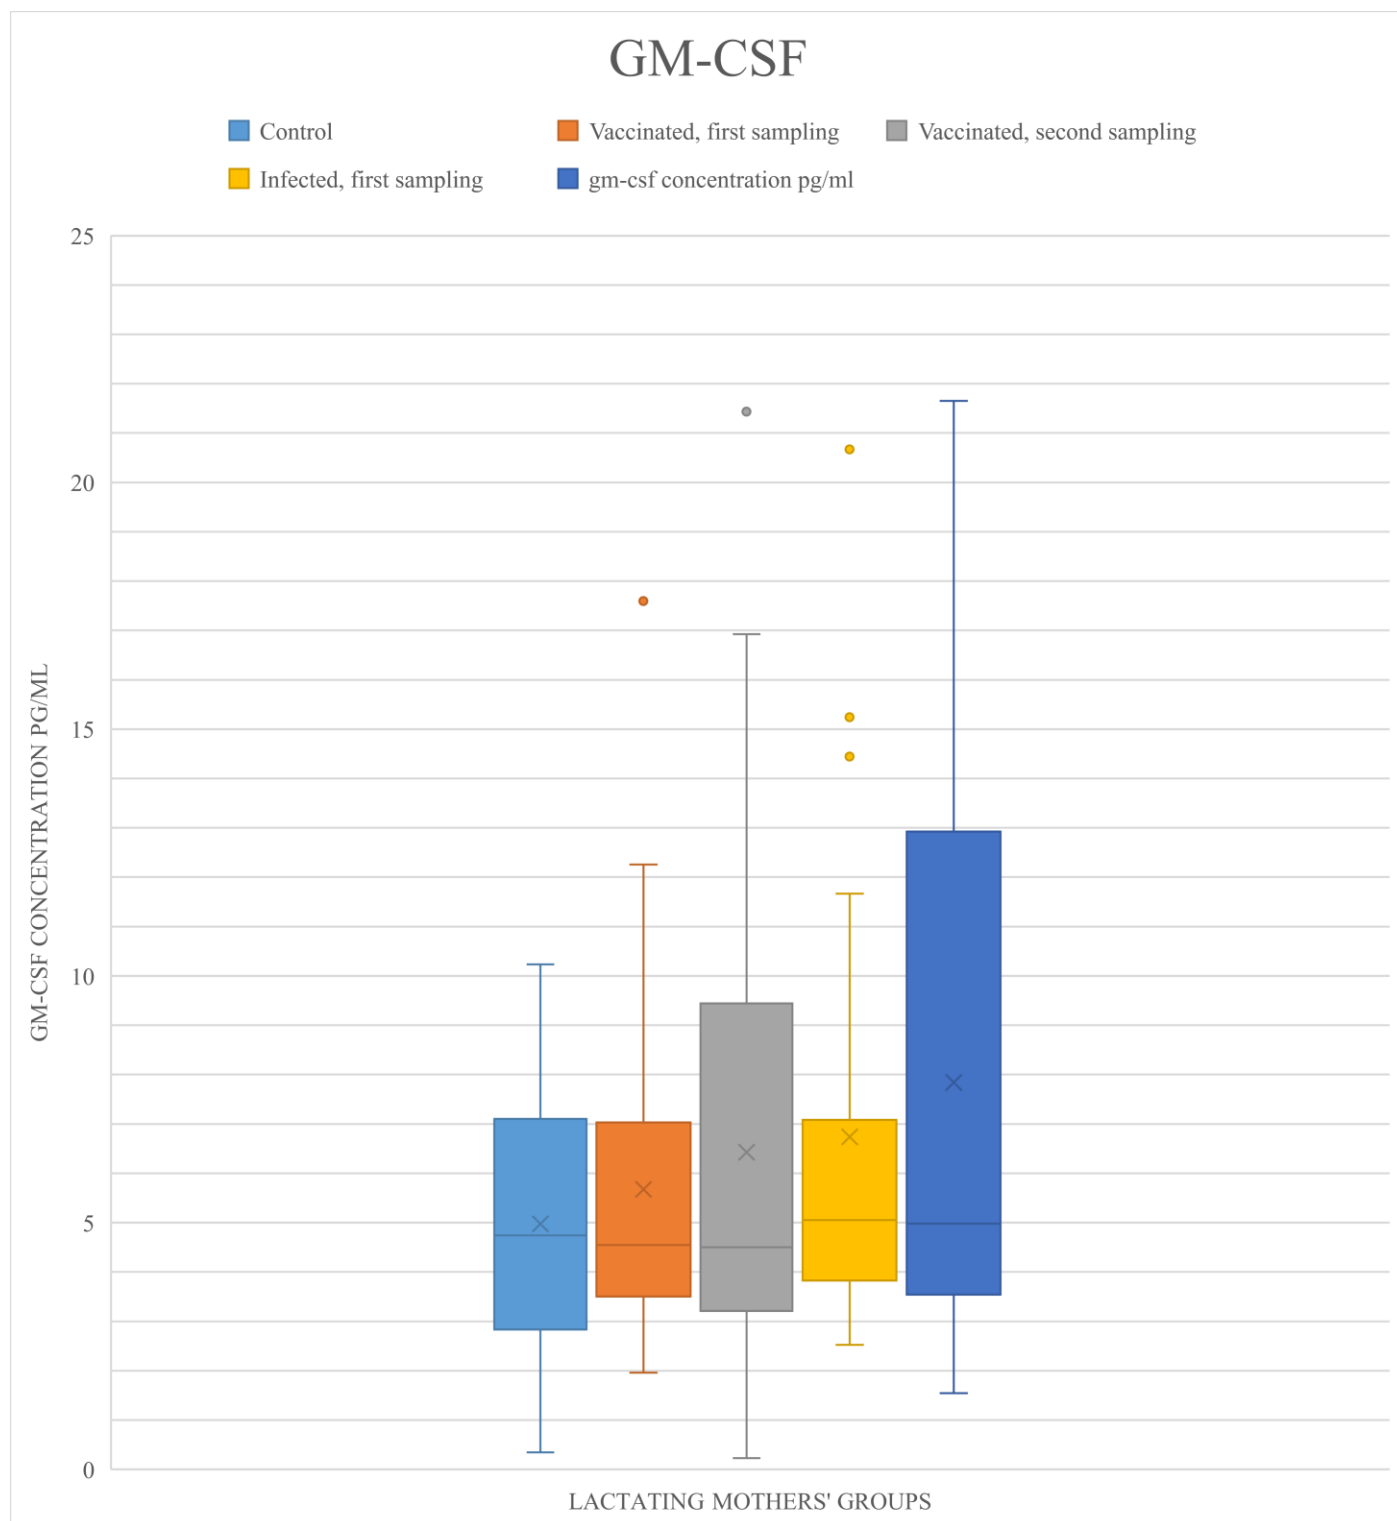

**Figure S17: GM-CSF concentrations range according to each study group, without extreme outliers for a better visibility**

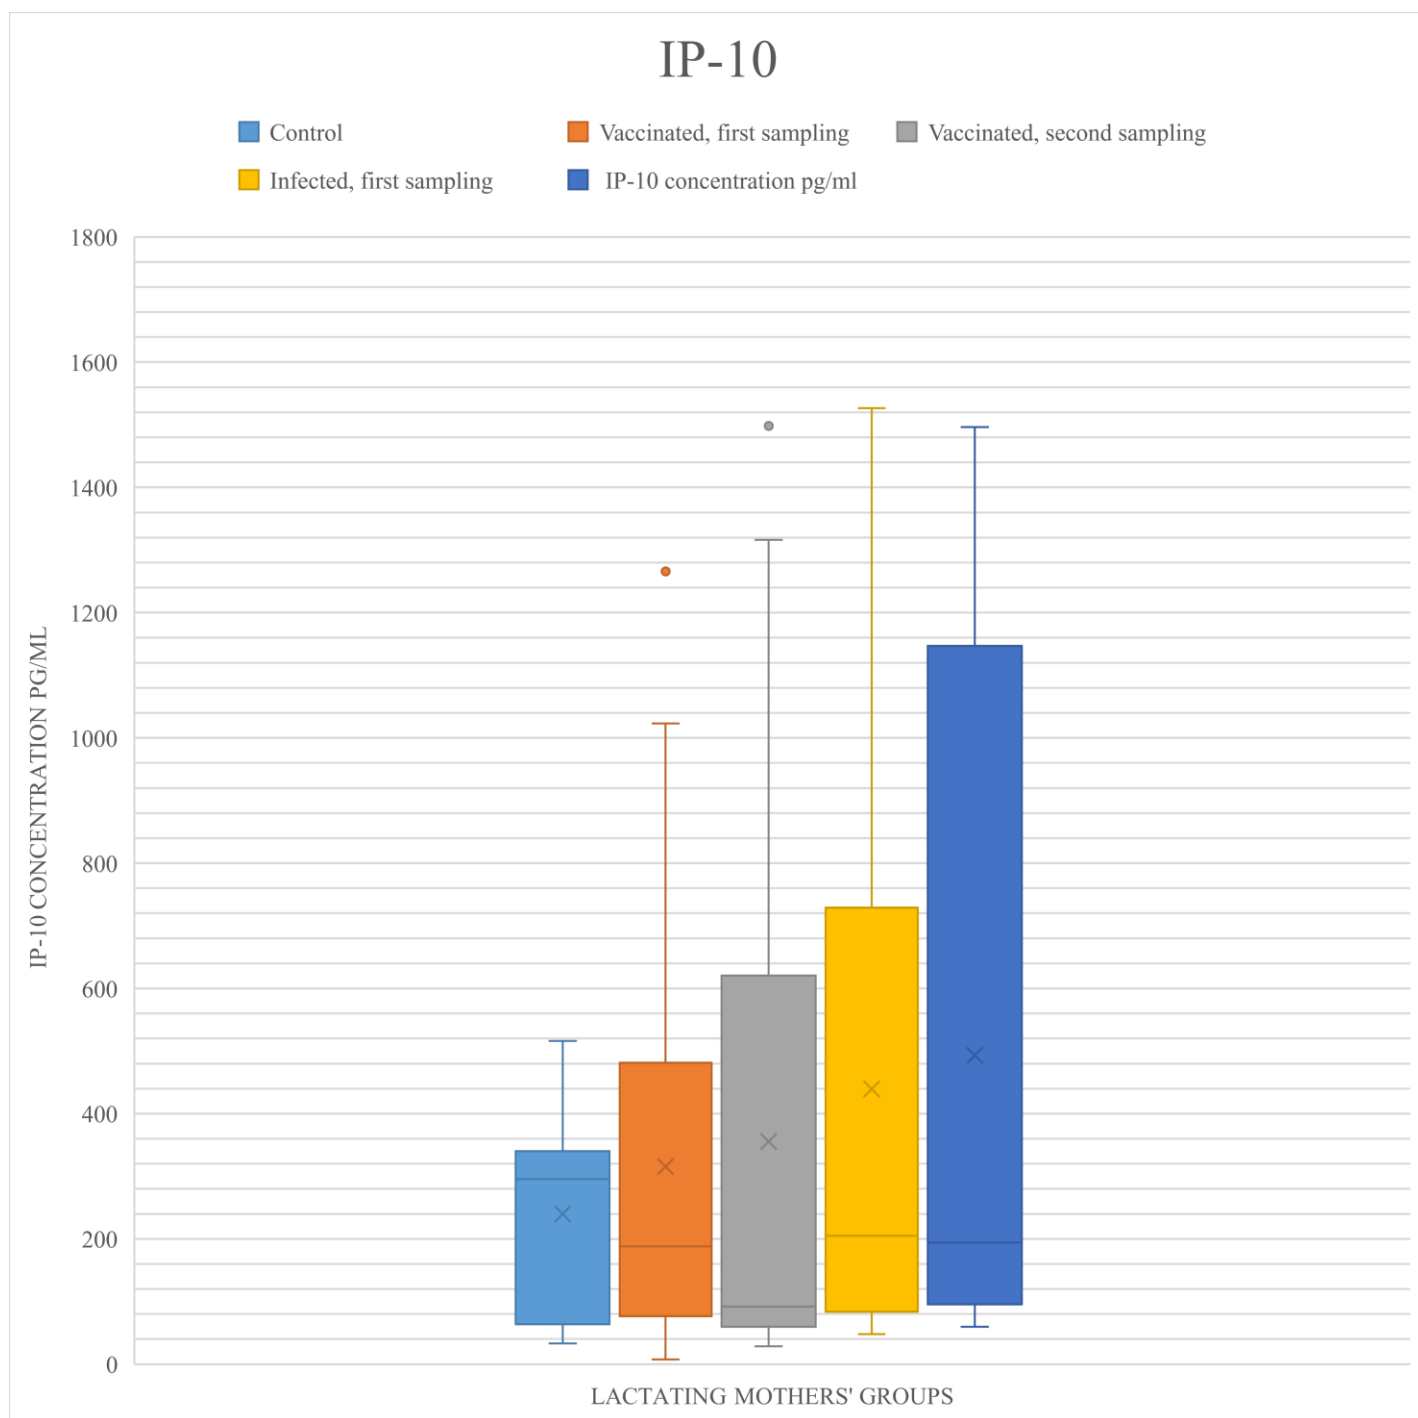

**Figure S18: IP-10 concentrations range according to each study group**

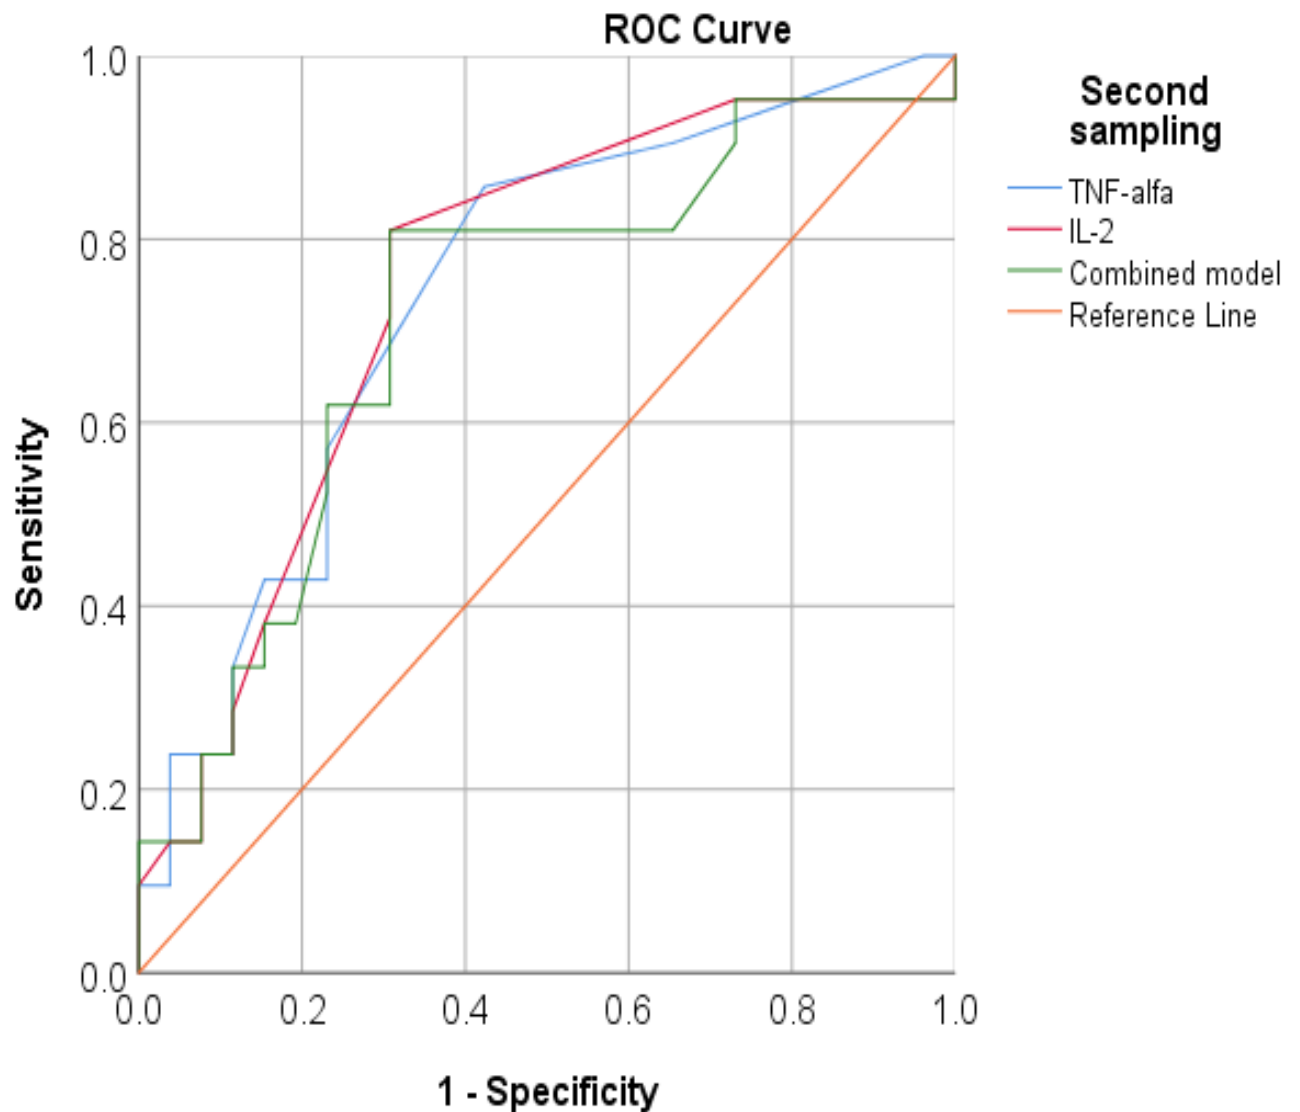

**Figure S19: ROC curves generated for biomarkers that best predicted the infection status: TNF-alpha and IL-2.** TNF-alpha and IL-2 equally predicted the infection status in our study group. The last model comprises the combined effect of these two selected biomarkers. For this analysis, the larger values of the test variables suggest indicate stronger evidence of a positive actual state (SARS-CoV-2 infection), while the AUC values between 0.7-0.8 define a good capacity of discrimination.
